# Supplementary material for: Stereoselective synthesis of backbone extended π-conjugated amino esters
Source: Royal Society of Chemistry journal article supplement (doi:10.1039/d3ob00090g), 2023-01-01

## Supporting Information

# Stereoselective Synthesis of Backbone Extended $\pi$ - Conjugated Amino Esters

Sachin A. Nalawade, Manjeet Singh, DRGKoppalu R. Puneeth Kumar, Sanjit Dey,  
Hosahudya N. Gopi\*

Department of Chemistry, Indian Institute of Science Education and Research, Dr. Homi Bhabha Road, Pashan,  
Pune-411 008, E-mail: [hn.gopi@iiserpune.ac.in](mailto:hn.gopi@iiserpune.ac.in)

### Table of Contents

|          |                                                                                                                                                                            |            |
|----------|----------------------------------------------------------------------------------------------------------------------------------------------------------------------------|------------|
| <b>1</b> | <b>ORTEP Diagrams</b>                                                                                                                                                      | <b>S2</b>  |
| <b>2</b> | <b>Crystallographic Information</b>                                                                                                                                        | <b>S7</b>  |
| <b>3</b> | <b>Chiral HPLC Trace of Compounds 2a, 4a, 5a, 7a, 2e and 4e</b>                                                                                                            | <b>S11</b> |
| <b>4</b> | <b><math>^1\text{H}</math> and <math>^{13}\text{C}</math> NMR Spectra of Compounds 2a-2g, 4a-4g, 5a-5c, 7a-7c,<br/>free carboxylic acid of 4c, free amine of 4c and 8a</b> | <b>S12</b> |

## 1) ORTEP Diagrams:

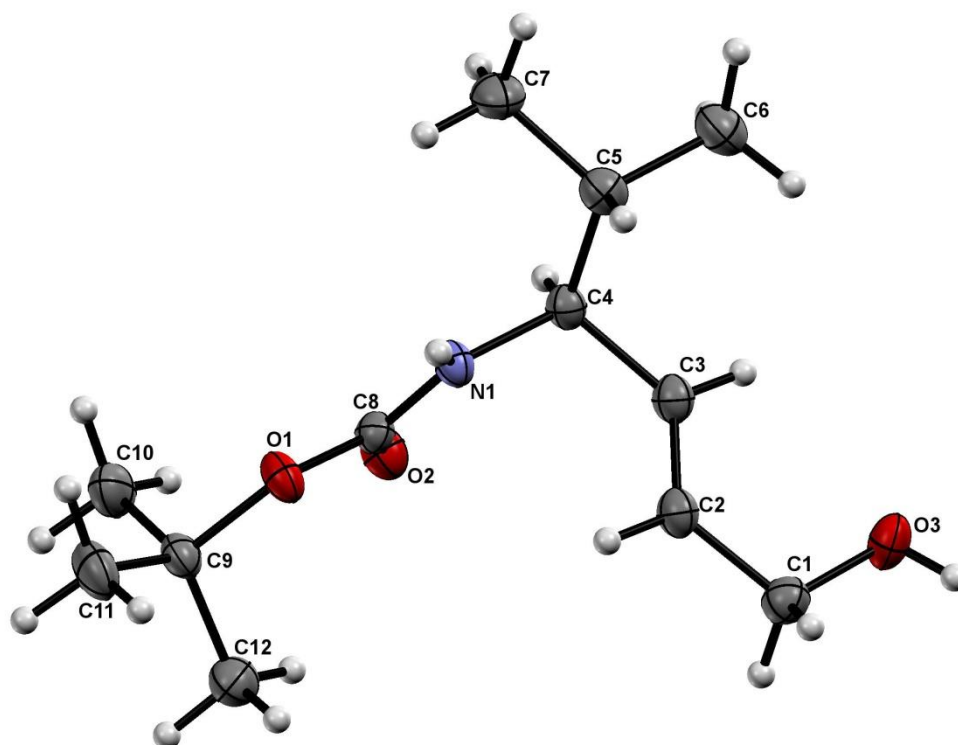

**Figure S1:** ORTEP diagram of compound **2a**. All H-atoms are not labeled for clarity. Ellipsoids are drawn at 50% probability. (CCDC no 2213473)

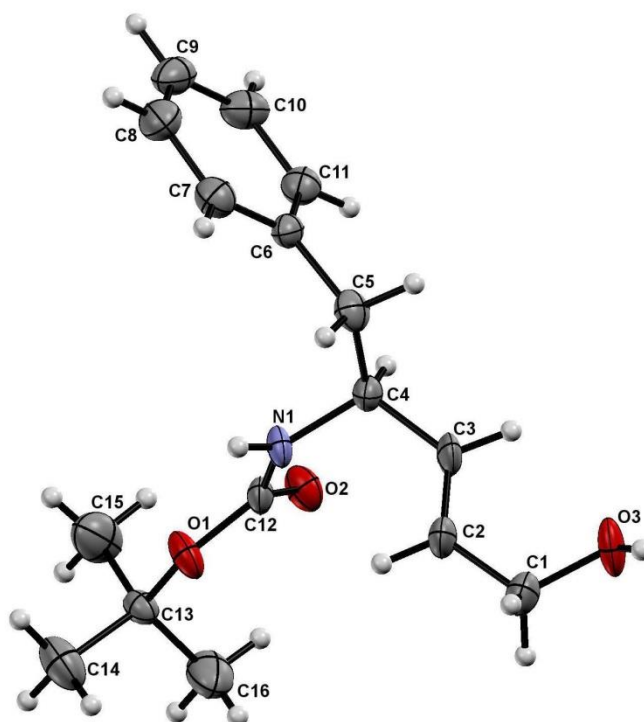

**Figure S2:** ORTEP diagram of compound **2b**. All H-atoms are not labeled for clarity. Ellipsoids are drawn at 50% probability. (CCDC no 2213474)

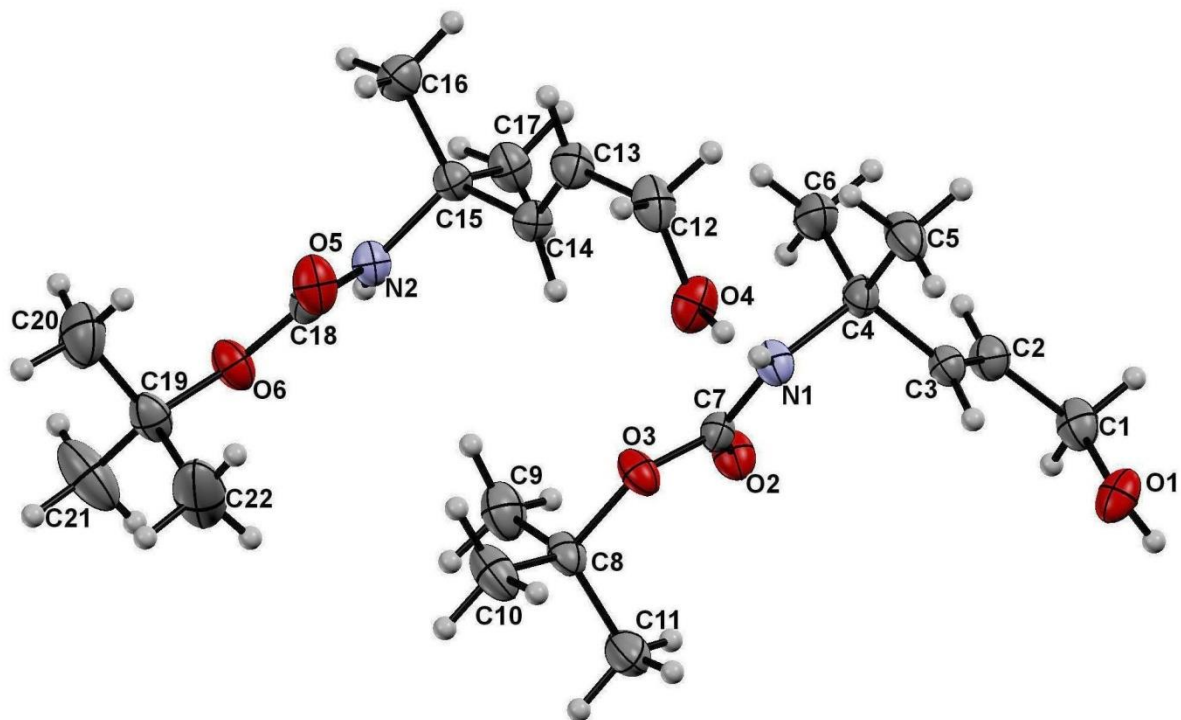

**Figure S3:** ORTEP diagram of compound **2c**. All H-atoms are not labeled for clarity. Two molecules appeared in the asymmetric unit. Ellipsoids are drawn at 50% probability. (CCDC no 2213475)

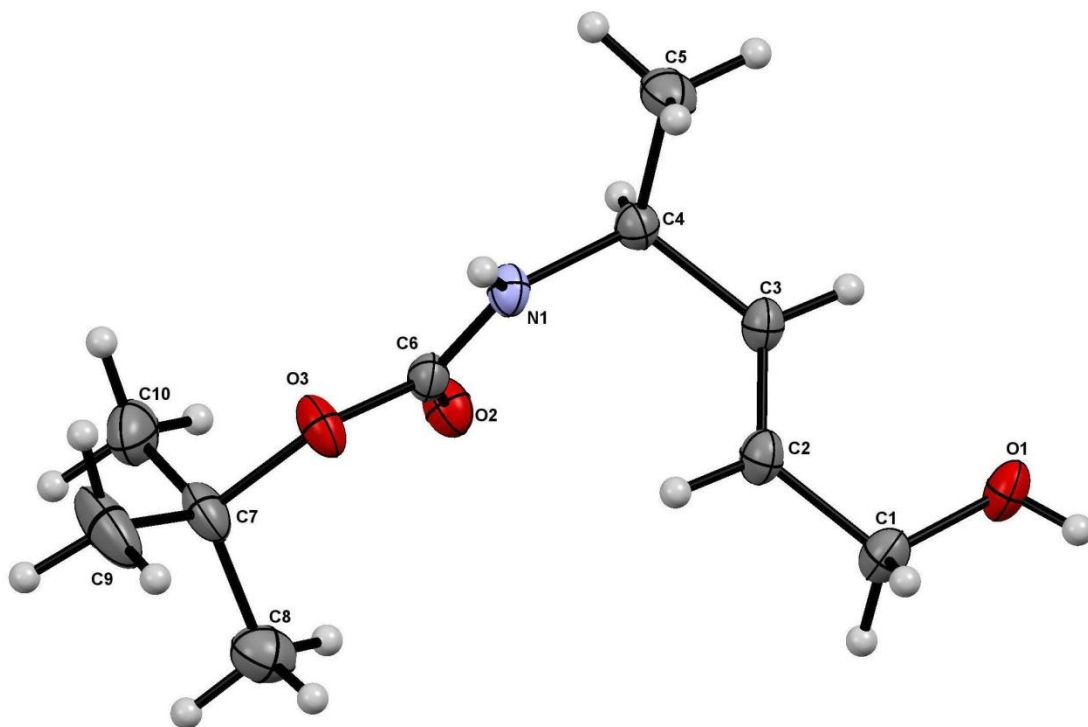

**Figure S4:** ORTEP diagram of compound **2d**. All H-atoms are not labeled for clarity. Ellipsoids are drawn at 50% probability. (CCDC no 2213476)

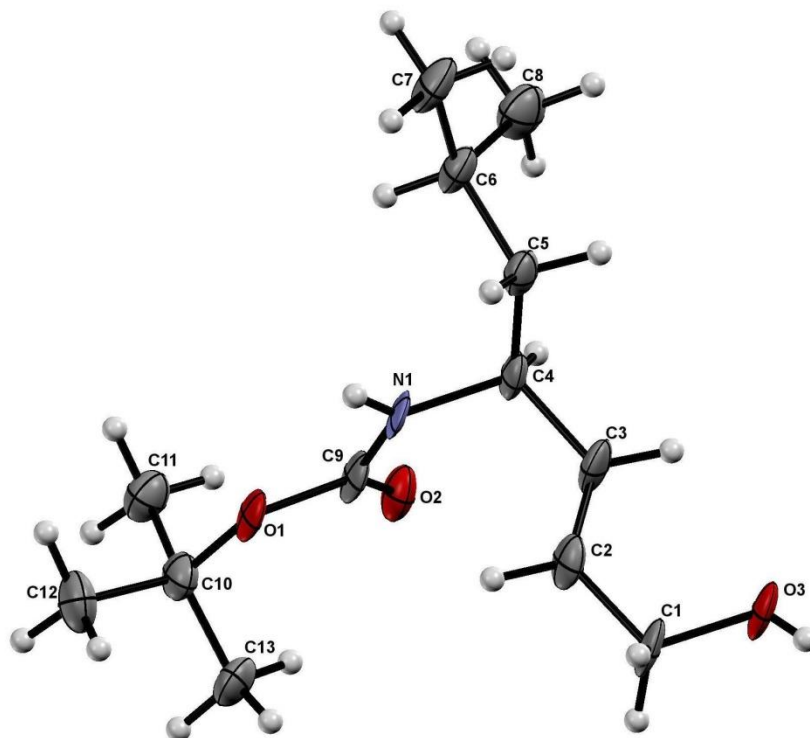

**Figure S5:** ORTEP diagram of compound **2e**. All H-atoms are not labeled for clarity. Ellipsoids are drawn at 50% probability. (CCDC no 2213477)

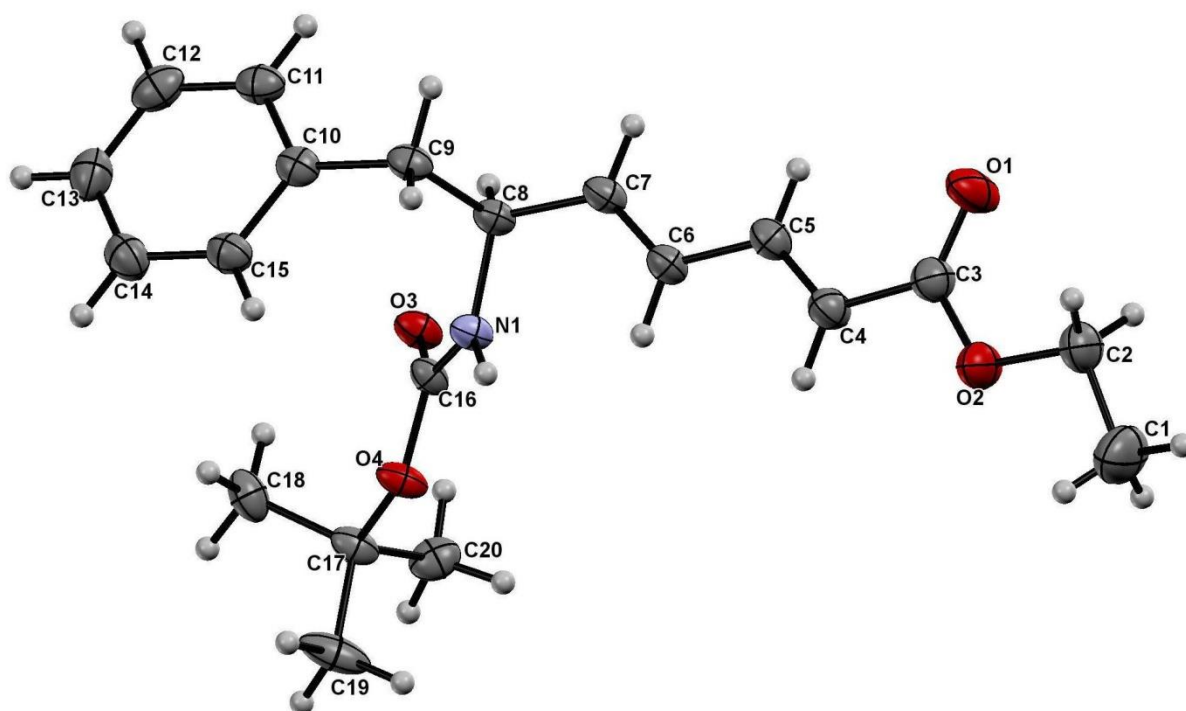

**Figure S6:** ORTEP diagram of compound **4b**. All H-atoms are not labeled for clarity. Ellipsoids are drawn at 50% probability. (CCDC no 2213478)

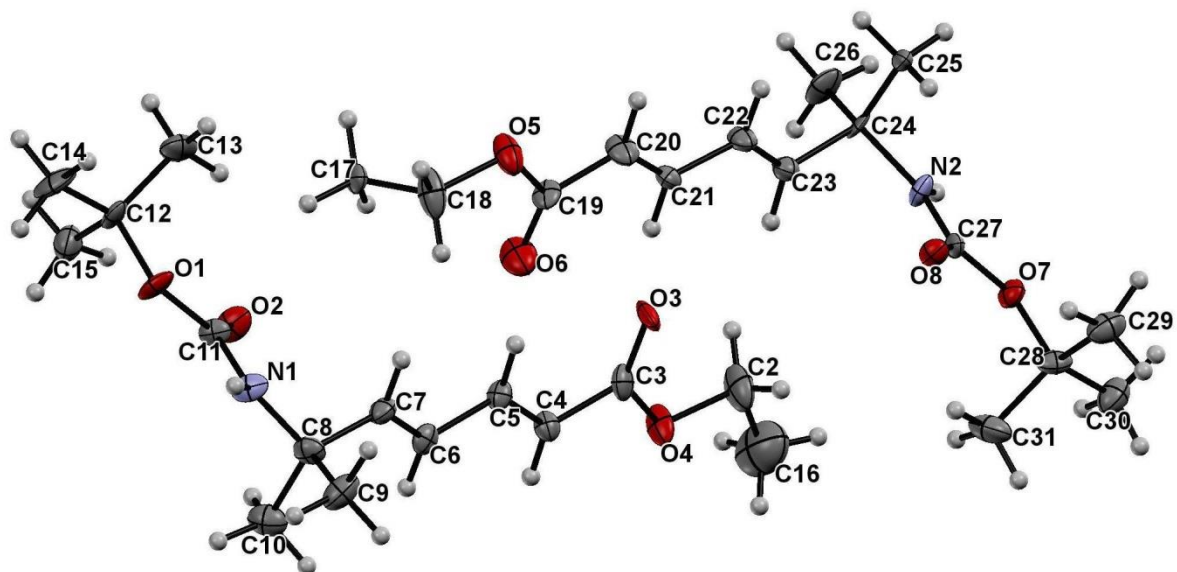

**Figure S7:** ORTEP diagram of compound **4c**. All H-atoms are not labeled for clarity. Two molecules appeared in the asymmetric unit. Ellipsoids are drawn at 50% probability. (CCDC no 2213479)

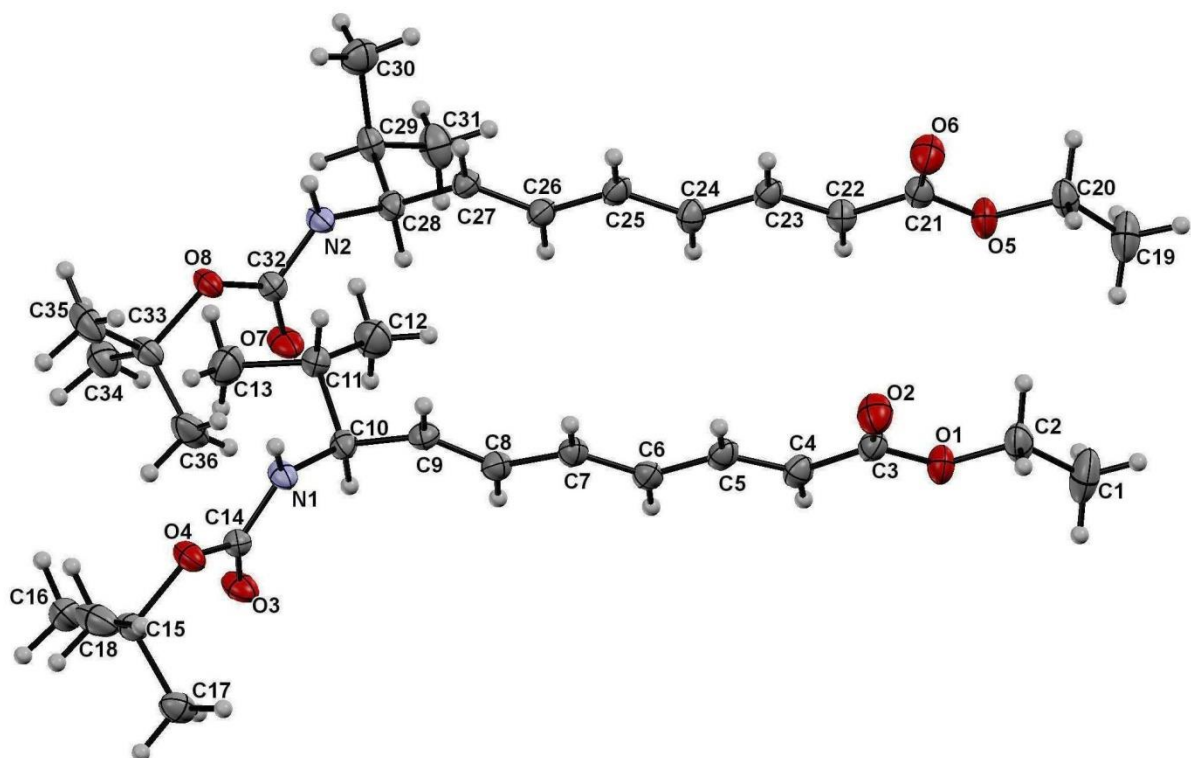

**Figure S8:** ORTEP diagram of compound **7a**. All H-atoms are not labeled for clarity. Two molecules appeared in the asymmetric unit. Ellipsoids are drawn at 50% probability. (CCDC no 2213480)

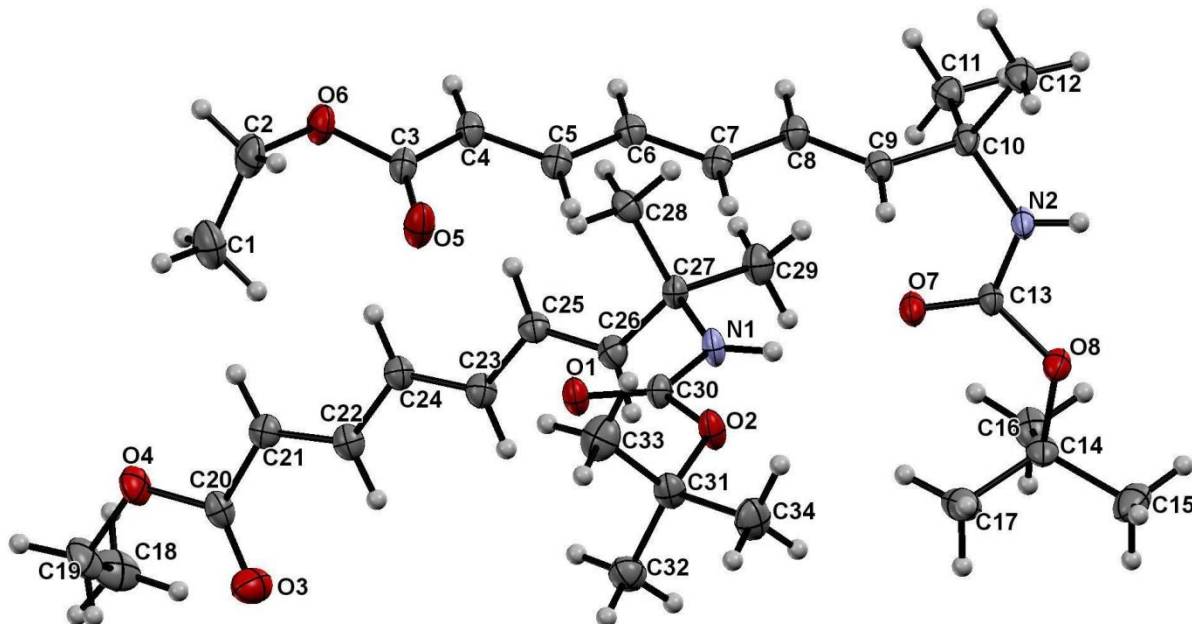

**Figure S9:** ORTEP diagram of compound **7c**. All H-atoms are not labeled for clarity. Two molecules appeared in the asymmetric unit. Ellipsoids are drawn at 50% probability. (CCDC no 2213481)

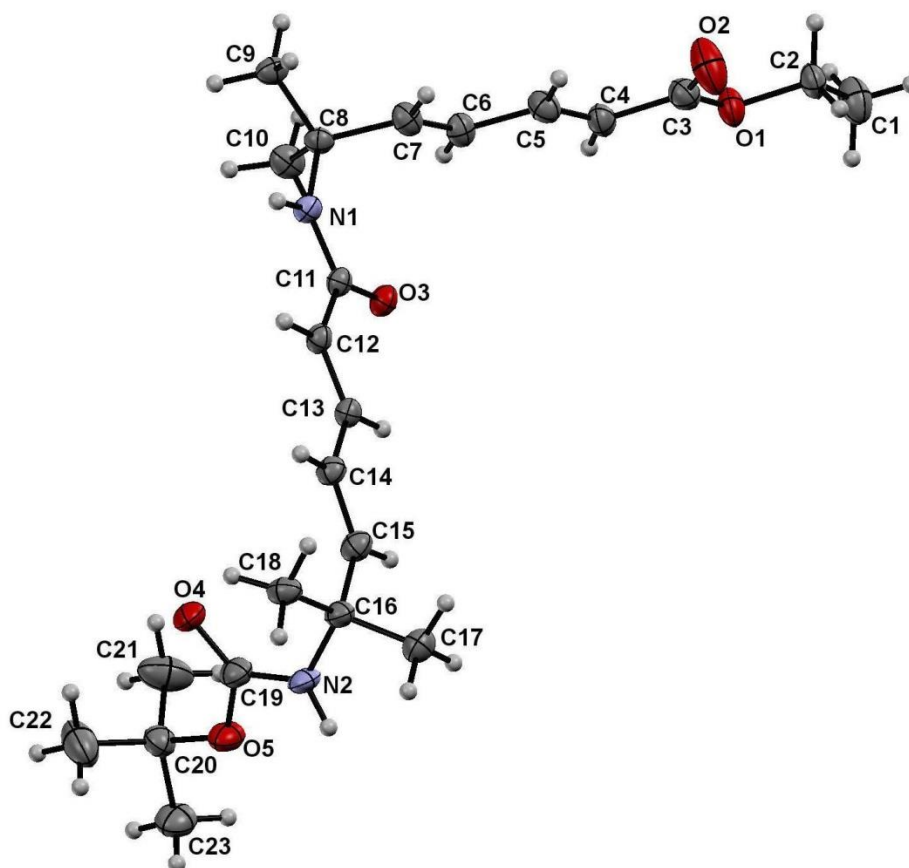

**Figure S10:** ORTEP diagram of compound **8a**. All H-atoms are not labeled for clarity. Ellipsoids are drawn at 50% probability. (CCDC no 2213482)

## 2) Crystallographic Information:

**Compound 2a:** Colourless needle shape Crystals of 2a were grown by slow evaporation from a solution of dichloromethane and n-heptane. A good quality single crystal ( $0.3 \times 0.05 \times 0.05$  mm) was mounted on the head of a goniometer using a loop with a small amount of paraffin oil. The X-ray diffraction data of a single crystal were collected at 100K temperature on a Bruker APEX(II) DUO CCD diffractometer using Cu K $\alpha$  radiation ( $\lambda = 1.54178 \text{ \AA}$ ),  $\omega$ -scans ( $2\theta = 149.64$ ), for a total of 12047 independent reflections. Space group P 21 21 21,  $a = 6.3864(10)$ ,  $b = 10.5866(17)$ ,  $c = 19.684(3)$ ,  $\beta = 90$ ,  $V = 1330.8(4) \text{ \AA}^3$ , Orthorhombic,  $Z = 4$  for chemical formula  $C_{12} H_{23} N O_3$ , with one molecule in asymmetric unit;  $\rho_{\text{calcd}} = 1.145 \text{ g cm}^{-3}$ ,  $\mu = 0.655 \text{ mm}^{-1}$ ,  $F(000) = 504.0$ ,  $R_{\text{int}} = 0.0499$ . The structure was obtained by direct methods using SHELXL-97.<sup>4</sup> The final R value was 0.0416 ( $wR2 = 0.0791$ ) 2590 observed reflections ( $F0 \geq 4\sigma(|F0|)$ ) and 152 variables,  $S = 1.062$ . The largest difference peak and hole were 0.195 and  $-0.167 \text{ e \AA}^{-3}$ , respectively.

**Compound 2b:** Colourless rod shape Crystals of 2b were grown by slow evaporation from a solution of ethyl acetate and n-hexane. A good quality single crystal ( $0.2 \times 0.1 \times 0.1$  mm) was mounted on the head of a goniometer using a loop with a small amount of paraffin oil. The X-ray diffraction data of a single crystal were collected at 100K temperature on a Bruker APEX(II) DUO CCD diffractometer using Mo  $K_{\alpha}$  radiation ( $\lambda = 0.71073 \text{ \AA}$ ),  $\omega$ -scans ( $2\theta = 56.824$ ), for a total of 68381 independent reflections. Space group P 21 21 21,  $a = 6.061(2)$ ,  $b = 12.023(4)$ ,  $c = 21.699(7)$ ,  $\beta = 90$ ,  $V = 1581.3(8) \text{ \AA}^3$ , Orthorhombic,  $Z = 4$  for chemical formula  $C_{16} H_{23} N O_3$ , with one molecule in asymmetric unit;  $\rho$  calcd =  $1.165 \text{ g cm}^{-3}$ ,  $\mu = 0.080 \text{ mm}^{-1}$ ,  $F(000) = 600.0$ ,  $R_{\text{int}} = 0.1671$ . The structure was obtained by direct methods using SHELXL-97.<sup>4</sup> The final R value was 0.0865 ( $wR_2 = 0.0657$ ) 3927 observed reflections ( $F_0 \geq 4\sigma(|F_0|)$ ) and 185 variables,  $S = 1.940$ . The largest difference in peak and hole were 0.223 and  $-0.218 \text{ e\AA}^{-3}$ , respectively.

**Compound 2c:** Colourless plate shape Crystals of 2c were grown by slow evaporation from a solution of dichloromethane and n-heptane. A good quality single crystal ( $0.52 \times 0.41 \times 0.31$  mm) was mounted on the head of a goniometer using a loop with a small amount of paraffin oil. The X-ray diffraction data of a single crystal were collected at 100K temperature on a Bruker APEX(II) DUO CCD diffractometer using Mo  $K_{\alpha}$  radiation ( $\lambda = 0.71073 \text{ \AA}$ ),  $\omega$ -scans ( $2\theta = 52.698$ ), for a total of 35186 independent reflections. Space group P  $\bar{1}$ ,  $a = 9.165(2)$ ,  $b = 10.586(3)$ ,  $c = 13.936(3)$ ,  $\beta = 108.378(7)$ ,  $V = 1282.1(5) \text{ \AA}^3$ , Triclinic,  $Z = 4$  for chemical formula  $C_{11} H_{21} N O_3$ , with two molecules in asymmetric unit;  $\rho$  calcd =  $1.115 \text{ g cm}^{-3}$ ,  $\mu = 0.080 \text{ mm}^{-1}$ ,  $F(000) = 472.0$ ,  $R_{\text{int}} = 0.0765$ . The structure was obtained by direct methods using SHELXL-97.<sup>4</sup> The final R value was 0.0941 ( $wR_2 = 0.1383$ ) 5120 observed reflections ( $F_0 \geq 4\sigma(|F_0|)$ ) and 284 variables,  $S = 1.152$ . The largest difference peak and hole were 0.251 and  $-0.250 \text{ e\AA}^{-3}$ , respectively.

**Compound 2d:** Colourless Plate shape Crystals of 2d were grown by slow evaporation from a solution of dichloromethane and n-heptane. A good quality single crystal ( $0.7 \times 0.6 \times 0.5$  mm) was mounted on the head of a goniometer using a loop with a small amount of paraffin oil. The X-ray diffraction data of a single crystal were collected at 100K temperature on a Bruker



APEX(II) DUO CCD diffractometer using Mo  $K_{\alpha}$  radiation ( $\lambda = 0.71073 \text{ \AA}$ ),  $\omega$ -scans ( $2\theta = 56.688$ ), for a total of 17718 independent reflections. Space group P 21 21 21,  $a = 6.5455(12)$ ,  $b = 9.445(2)$ ,  $c = 19.264(4)$ ,  $\beta = 90$ ,  $V = 1191.0(4) \text{ \AA}^3$ , Orthorhombic,  $Z = 4$  for chemical formula  $C_{10}H_{19}NO_3$ , with one molecule in asymmetric unit;  $\rho_{\text{calcd}} = 1.122 \text{ g cm}^{-3}$ ,  $\mu = 0.082 \text{ mm}^{-1}$ ,  $F(000) = 440.0$ ,  $R_{\text{int}} = 0.0488$ . The structure was obtained by direct methods using SHELXL-97.<sup>4</sup> The final R value was 0.0352 ( $wR_2 = 0.0781$ ) 2966 observed reflections ( $F_0 \geq 4\sigma(|F_0|)$ ) and 133 variables,  $S = 0.995$ . The largest difference peak and hole were 0.175 and  $-0.186 \text{ e \AA}^{-3}$ , respectively.

**Compound 2e:** Colourless plate shape Crystals of 2e were grown by slow evaporation from a solution of ethyl acetate and n-hexane. A good quality single crystal ( $0.4 \times 0.3 \times 0.2 \text{ mm}$ ) was mounted on the head of a goniometer using a loop with a small amount of paraffin oil. The X-ray diffraction data of a single crystal were collected at 100K temperature on a Bruker APEX(II) DUO CCD diffractometer using Mo  $K_{\alpha}$  radiation ( $\lambda = 0.71073 \text{ \AA}$ ),  $\omega$ -scans ( $2\theta = 48.998$ ), for a total of 15175 independent reflections. Space group P 21 21 2,  $a = 11.178(7)$ ,  $b = 21.505(13)$ ,  $c = 6.138(4)$ ,  $\beta = 90$ ,  $V = 1475.4(15) \text{ \AA}^3$ , Orthorhombic,  $Z = 4$  for chemical formula  $C_{13}H_{25}NO_3$ , with one molecule in asymmetric unit;  $\rho_{\text{calcd}} = 1.095 \text{ g cm}^{-3}$ ,  $\mu = 0.077 \text{ mm}^{-1}$ ,  $F(000) = 536.0$ ,  $R_{\text{int}} = 0.1319$ . The structure was obtained by direct methods using SHELXL-97.<sup>4</sup> The final R value was 0.0942 ( $wR_2 = 0.2125$ ) 2434 observed reflections ( $F_0 \geq 4\sigma(|F_0|)$ ) and 149 variables,  $S = 1.021$ . The largest difference peak and hole were 0.484 and  $-0.311 \text{ e \AA}^{-3}$ , respectively.

**Compound 4b:** Colourless plate shape Crystals of 4b were grown by slow evaporation from a solution of dichloromethane and n-heptane. A good quality single crystal ( $0.33 \times 0.25 \times 0.17 \text{ mm}$ ) was mounted on the head of a goniometer using a loop with a small amount of paraffin oil. The X-ray diffraction data of a single crystal were collected at 100K temperature on a Bruker APEX(II) DUO CCD diffractometer using Mo  $K_{\alpha}$  radiation ( $\lambda = 0.71073 \text{ \AA}$ ),  $\omega$ -scans ( $2\theta = 56.702$ ), for a total of 27968 independent reflections. Space group C 2,  $a = 35.93(5)$ ,  $b = 5.117(8)$ ,  $c = 10.707(16)$ ,  $\beta = 92.39(3)$ ,  $V = 1967(5) \text{ \AA}^3$ , Monoclinic,  $Z = 4$  for chemical formula  $C_{20}H_{27}NO_4$ , with one molecule in asymmetric unit;  $\rho_{\text{calcd}} = 1.166 \text{ g cm}^{-3}$ ,  $\mu = 0.081 \text{ mm}^{-1}$ ,  $F(000) = 744.0$ ,  $R_{\text{int}} = 0.0730$ . The structure was obtained by direct methods using SHELXL-

97.<sup>4</sup> The final R value was 0.0522 (wR2 = 0.1352) 4866 observed reflections ( $F0 \geq 4\sigma(|F0|)$ ) and 231 variables, S = 0.679. The largest difference peak and hole were 0.278 and -0.242 eÅ<sup>3</sup>, respectively.

**Compound 4c:** Colourless plate shape Crystals of 4c were grown by slow evaporation from a solution of dichloromethane and n-heptane. A good quality single crystal (0.42 × 0.30 × 0.22 mm) was mounted on the head of a goniometer using a loop with a small amount of paraffin oil. The X-ray diffraction data of a single crystal were collected at 100K temperature on a Bruker APEX(II) DUO CCD diffractometer using Mo K<sub>α</sub> radiation ( $\lambda = 0.71073 \text{ \AA}$ ),  $\omega$ -scans ( $2\theta = 56.844$ ), for a total of 63821 independent reflections. Space group P c, a = 9.1906(18), b = 18.987(4), c = 9.7142(16),  $\beta = 100.338(6)$ , V = 1667.6(5) Å<sup>3</sup>, Monoclinic, Z = 4 for chemical formula C<sub>15</sub> H<sub>25</sub> N O<sub>4</sub>, with two molecules in asymmetric unit;  $\rho$  calcd = 1.129 gcm<sup>-3</sup>,  $\mu = 0.081 \text{ mm}^{-1}$ , F (000) = 616.0, Rint= 0.1210. The structure was obtained by direct methods using SHELXL-97.<sup>4</sup> The final R value was 0.0866 (wR2 = 0.1342) 8309 observed reflections ( $F0 \geq 4\sigma(|F0|)$ ) and 374 variables, S = 0.997. The largest difference peak and hole were 0.749 and -0.406 eÅ<sup>3</sup>, respectively.

**Compound 7a:** Colourless plate shape Crystals of 7a were grown by slow evaporation from a solution of dichloromethane and n-heptane. A good quality single crystal (0.28 × 0.21 × 0.17 mm) was mounted on the head of a goniometer using a loop with a small amount of paraffin oil. The X-ray diffraction data of a single crystal were collected at 100K temperature on a Bruker APEX(II) DUO CCD diffractometer using Mo K<sub>α</sub> radiation ( $\lambda = 0.71073 \text{ \AA}$ ),  $\omega$ -scans ( $2\theta = 57.14$ ), for a total of 25003 independent reflections. Space group P -1, a = 10.171(4), b = 11.307(4), c = 18.203(6),  $\beta = 78.945(8)$ , V = 1922.9(12) Å<sup>3</sup>, Triclinic, Z = 4 for chemical formula C<sub>18</sub> H<sub>29</sub> N O<sub>4</sub>, with two molecules in asymmetric unit;  $\rho$  calcd = 1.117 gcm<sup>-3</sup>,  $\mu = 0.078 \text{ mm}^{-1}$ , F (000) = 704.0, Rint= 0.0976. The structure was obtained by direct methods using SHELXL-97.<sup>4</sup> The final R value was 0.0681 (wR2 = 0.1411) 9658 observed reflections ( $F0 \geq 4\sigma(|F0|)$ ) and 428 variables, S = 0.919. The largest difference peak and hole were 0.324 and -0.253 eÅ<sup>3</sup>, respectively.

**Compound 7c:** Colourless rod shape Crystals of 7c were grown by slow evaporation from a solution of dichloromethane and n-heptane. A good quality single crystal (0.38 × 0.15 × 0.14

mm) was mounted on the head of a goniometer using a loop with a small amount of paraffin oil. The X-ray diffraction data of a single crystal were collected at 100K temperature on a Bruker APEX(II) DUO CCD diffractometer using Mo K $\alpha$  radiation ( $\lambda = 0.71073 \text{ \AA}$ ),  $\omega$ -scans ( $2\theta = 56.844$ ), for a total of 78922 independent reflections. Space group P 21/c,  $a = 9.880(3)$ ,  $b = 20.895(7)$ ,  $c = 18.293(6)$ ,  $\beta = 105.188(10)$ ,  $V = 3645(2) \text{ \AA}^3$ , Monoclinic,  $Z = 8$  for chemical formula C<sub>17</sub> H<sub>27</sub> N O<sub>4</sub>, with two molecules in asymmetric unit;  $\rho_{\text{calcd}} = 1.128 \text{ gcm}^{-3}$ ,  $\mu = 0.079 \text{ mm}^{-1}$ ,  $F(000) = 1344.0$ ,  $R_{\text{int}} = 0.1187$ . The structure was obtained by direct methods using SHELXL-97.<sup>4</sup> The final R value was 0.0619 ( $wR2 = 0.1811$ ) 9130 observed reflections ( $F0 \geq 4\sigma(|F0|)$ ) and 410 variables,  $S = 0.726$ . The largest difference peak and hole were 0.339 and -0.311 e $\text{\AA}^3$ , respectively.

**Compound 8a:** Colourless plate shape Crystals of 8a were grown by slow evaporation from a solution of methanol and water. A good quality single crystal ( $0.2 \times 0.09 \times 0.05 \text{ mm}$ ) was mounted on the head of a goniometer using a loop with a small amount of paraffin oil. The X-ray diffraction data of a single crystal were collected at 100K temperature on a Bruker APEX(II) DUO CCD diffractometer using Mo K $\alpha$  radiation ( $\lambda = 0.71073 \text{ \AA}$ ),  $\omega$ -scans ( $2\theta = 57.312$ ), for a total of 33779 independent reflections. Space group P n a 21,  $a = 9.447(4)$ ,  $b = 7.160(3)$ ,  $c = 36.118(16)$ ,  $\beta = 90$ ,  $V = 2443.1(19) \text{ \AA}^3$ , Orthorhombic,  $Z = 4$  for chemical formula C<sub>23</sub> H<sub>36</sub> N<sub>2</sub> O<sub>5</sub>, with one molecule in asymmetric unit;  $\rho_{\text{calcd}} = 1.143 \text{ gcm}^{-3}$ ,  $\mu = 0.080 \text{ mm}^{-1}$ ,  $F(000) = 912$ ,  $R_{\text{int}} = 0.0837$ . The structure was obtained by direct methods using SHELXL-97.<sup>4</sup> The final R value was 0.0652 ( $wR2 = 0.1504$ ) 6159 observed reflections ( $F0 \geq 4\sigma(|F0|)$ ) and 280 variables,  $S = 1.041$ . The largest difference peak and hole were 0.477 and -0.238 e $\text{\AA}^3$ , respectively.

### 3) Chiral HPLC Trace of Compounds 2a, 4a, 5a, 7a, 2e and 4e :

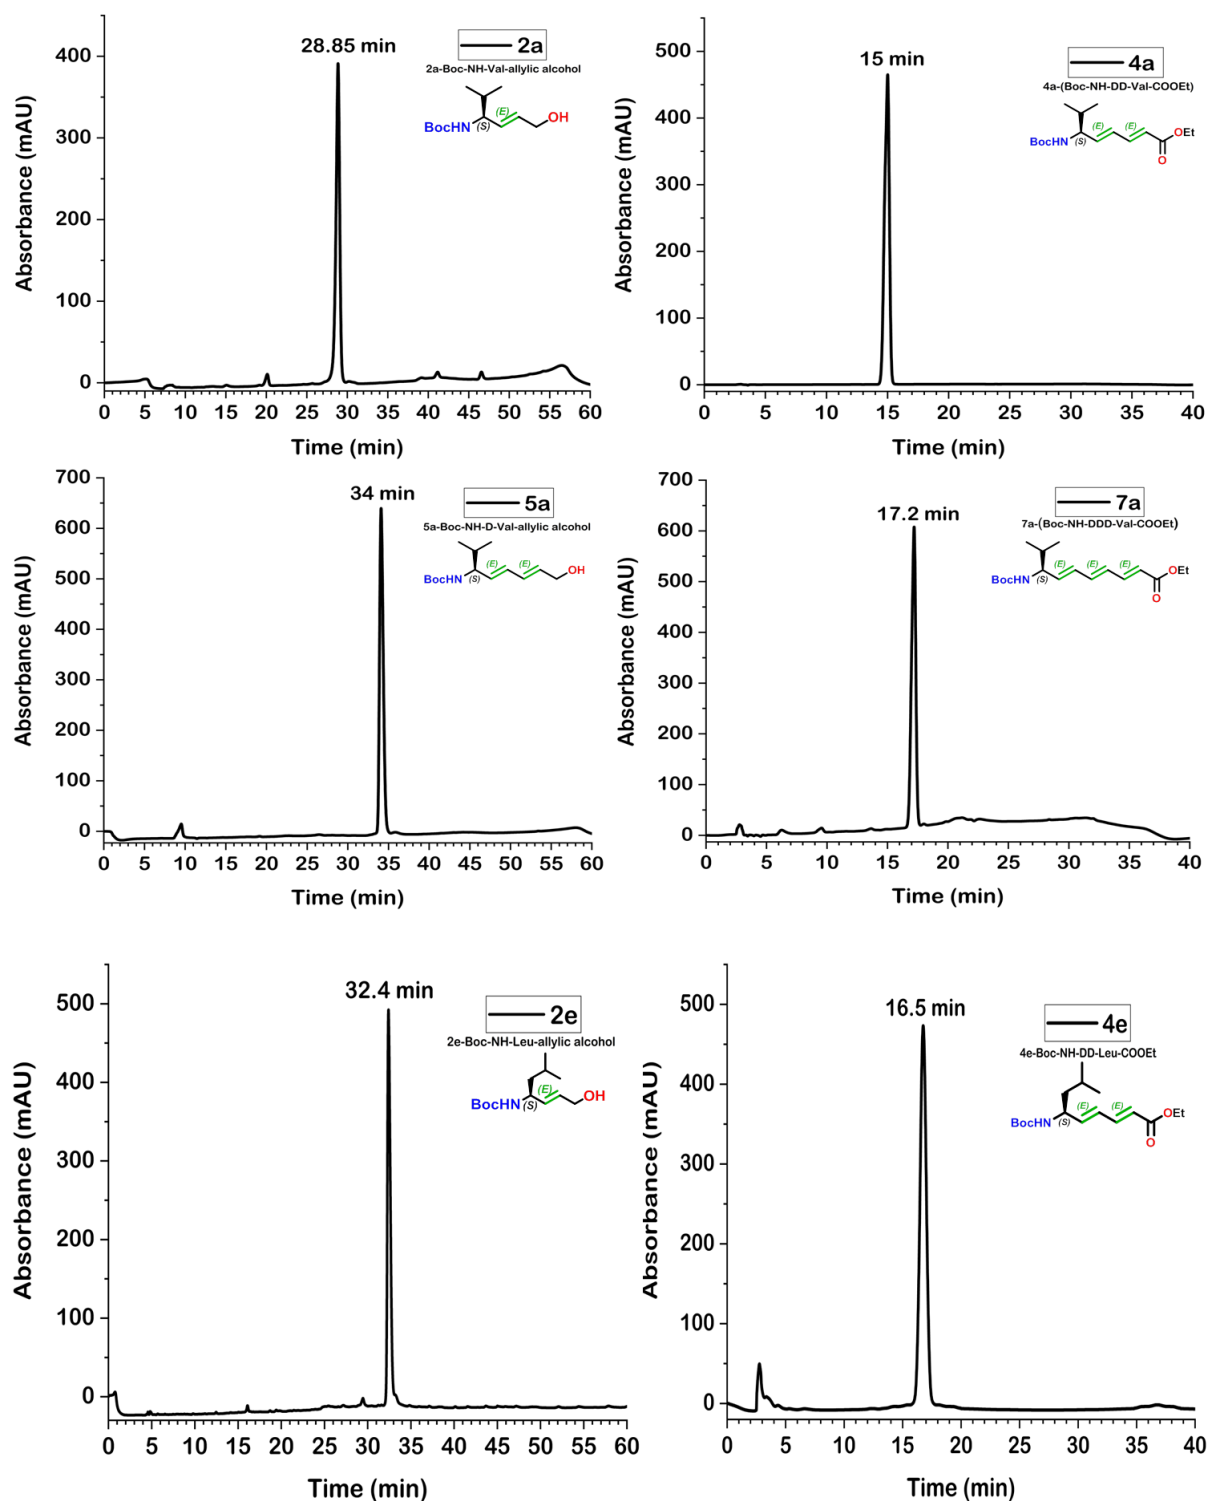

**Figure S11:** Chiral HPLC trace of Compounds 2a, 4a, 5a, 7a, 2e and 4e. The HPLC was performed on the DAICEL CHIRALPAK-IC column using an n-hexane/isopropanol (95/5) solvent system at isocratic mode with a flow rate of 1 mL/min.

#### 4) $^1\text{H}$ and $^{13}\text{C}$ NMR Spectra of all Compounds

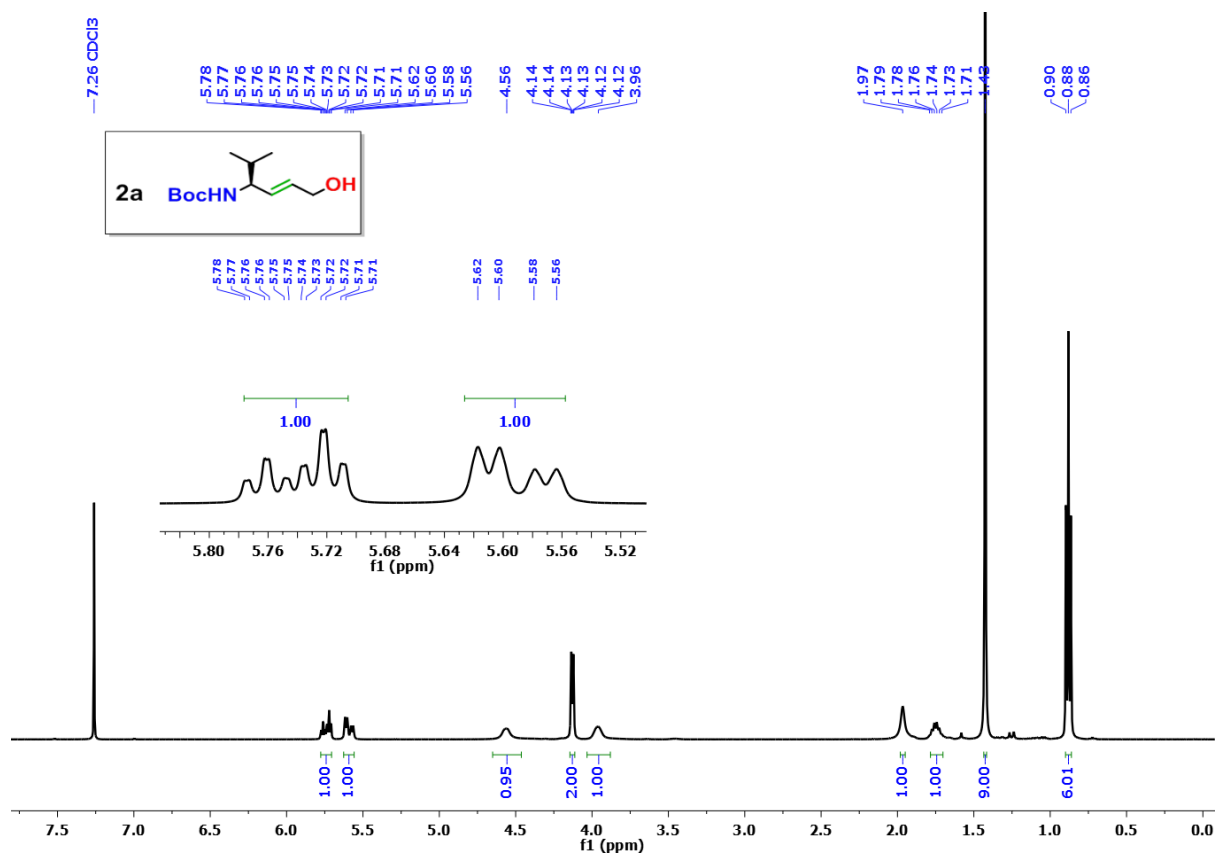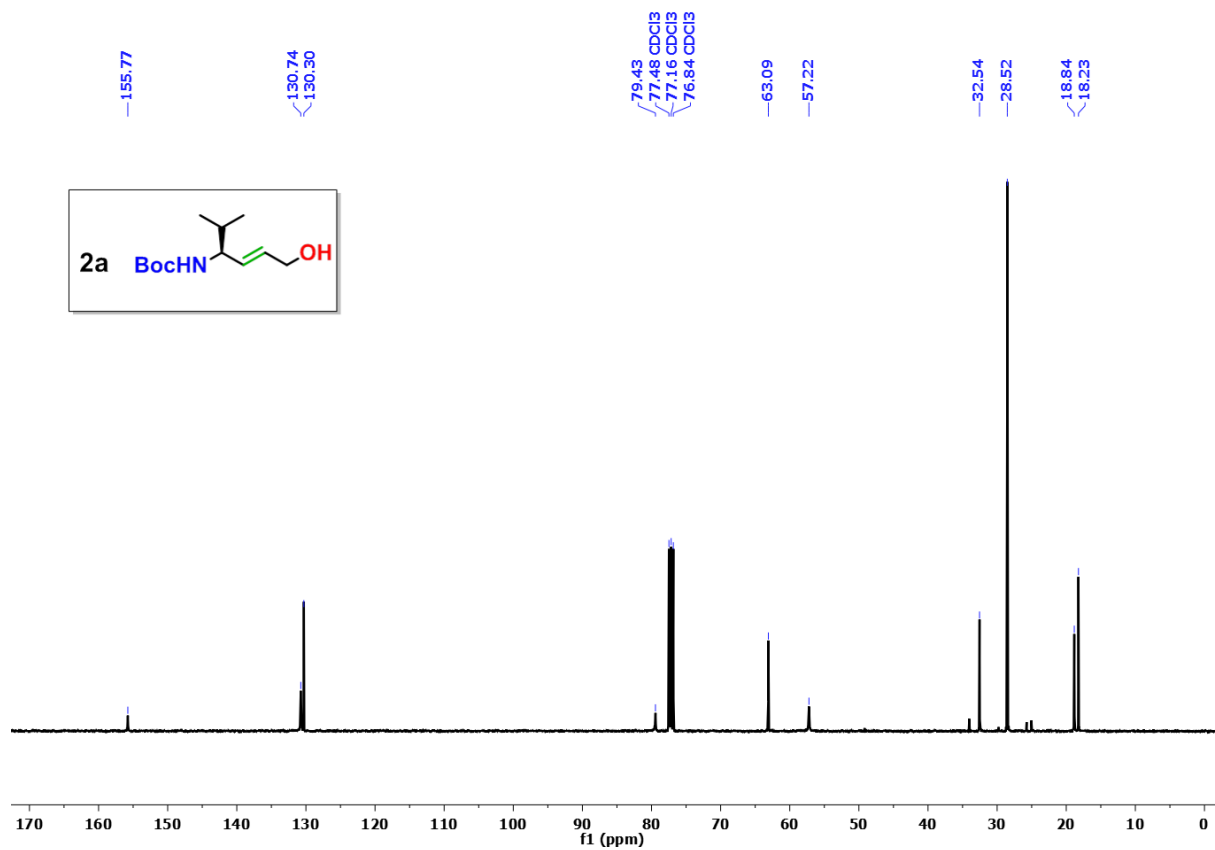

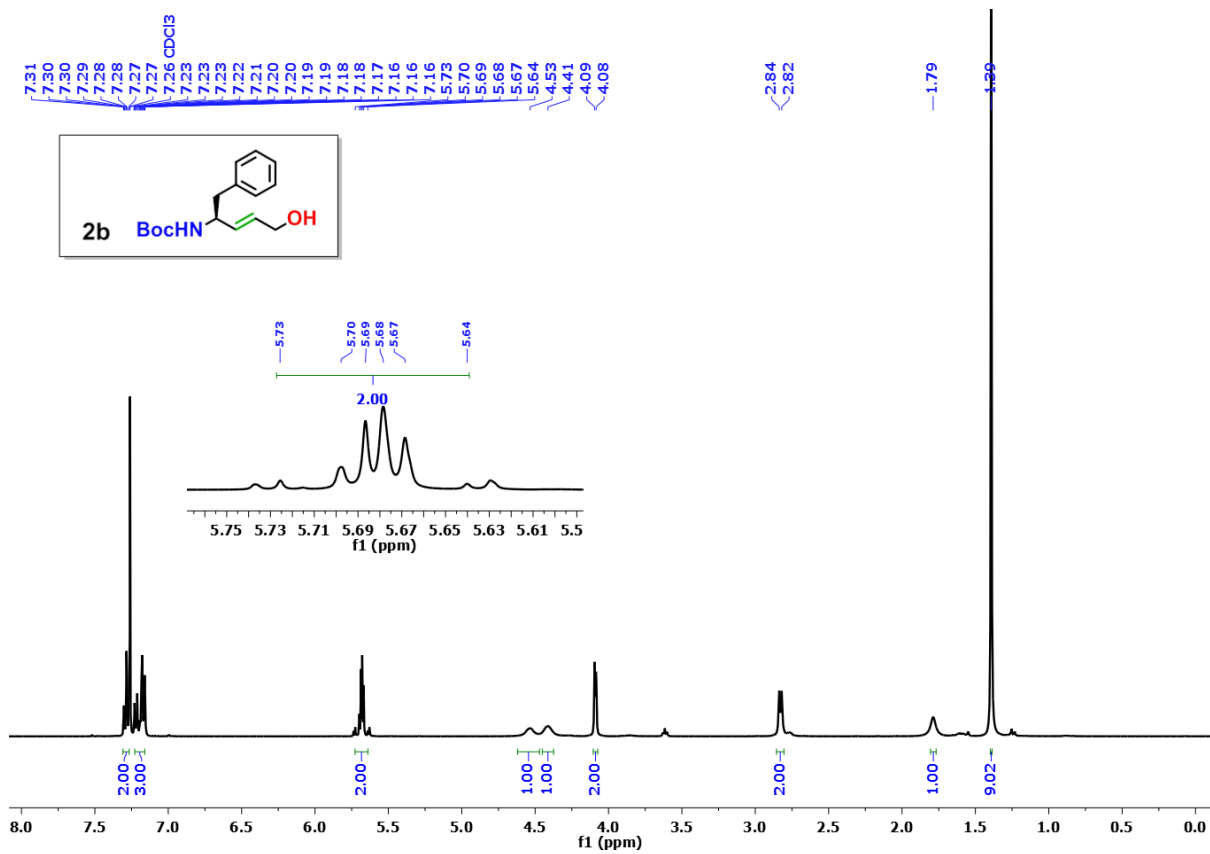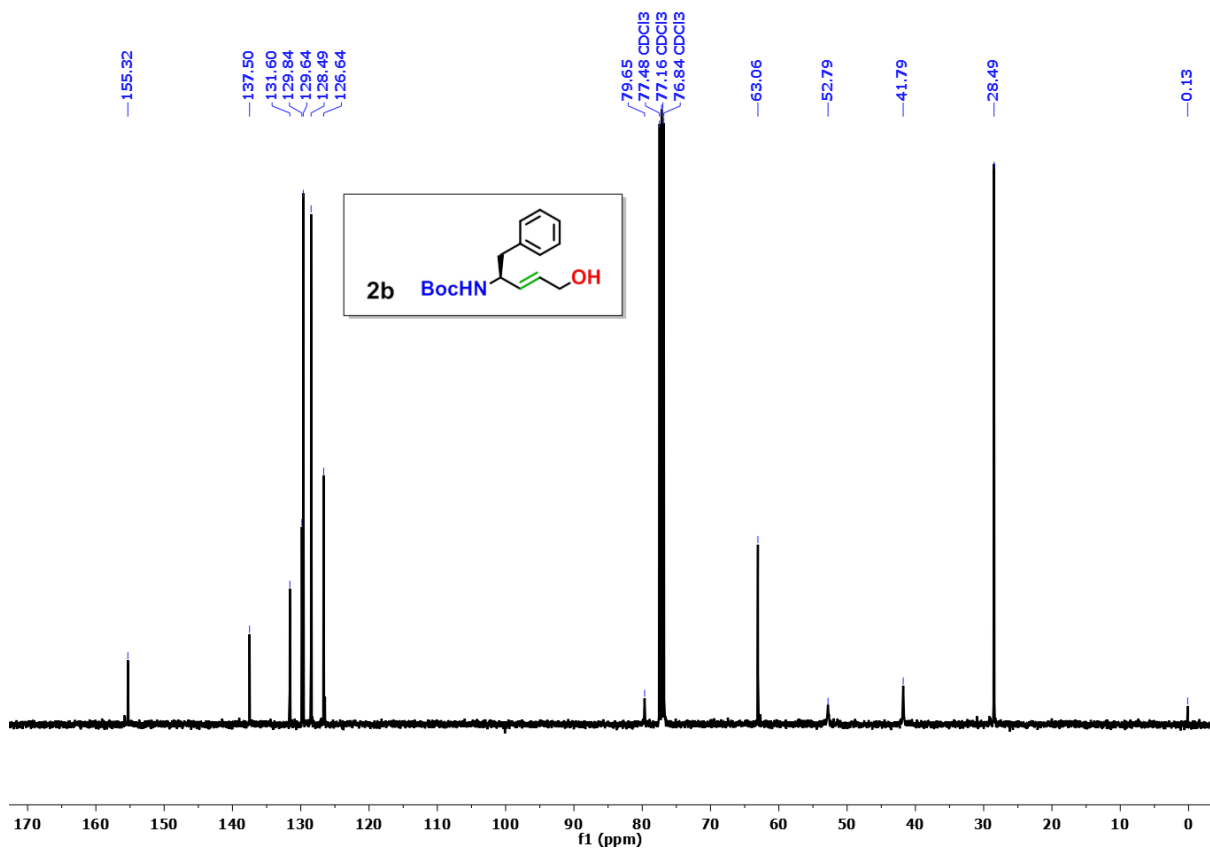

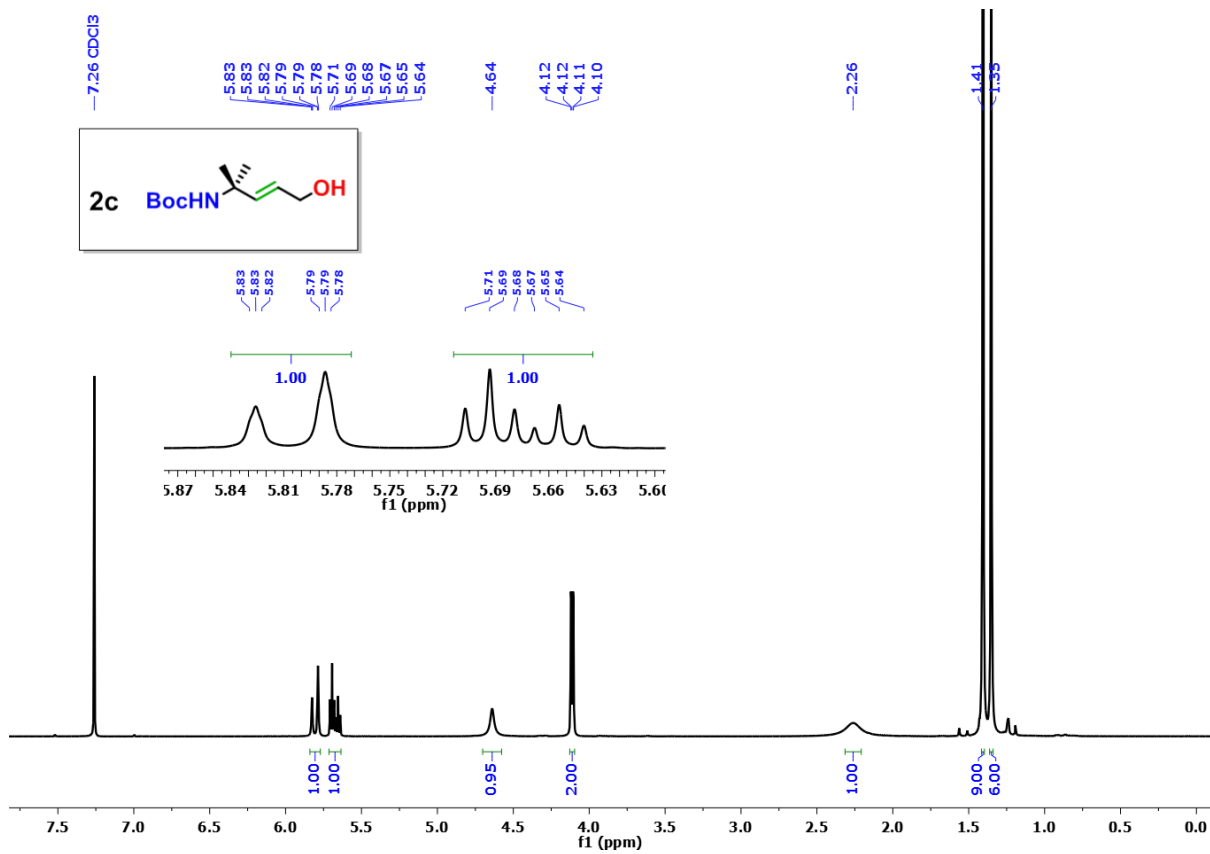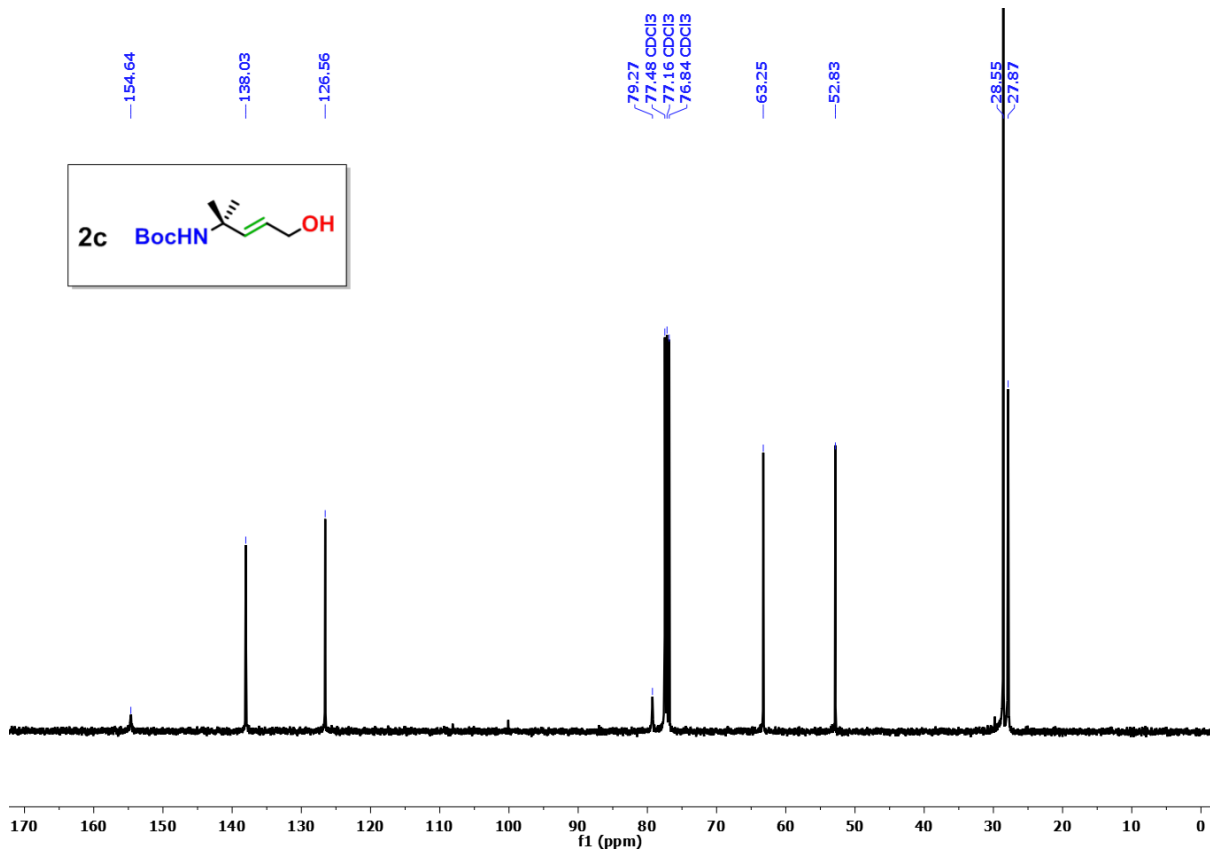

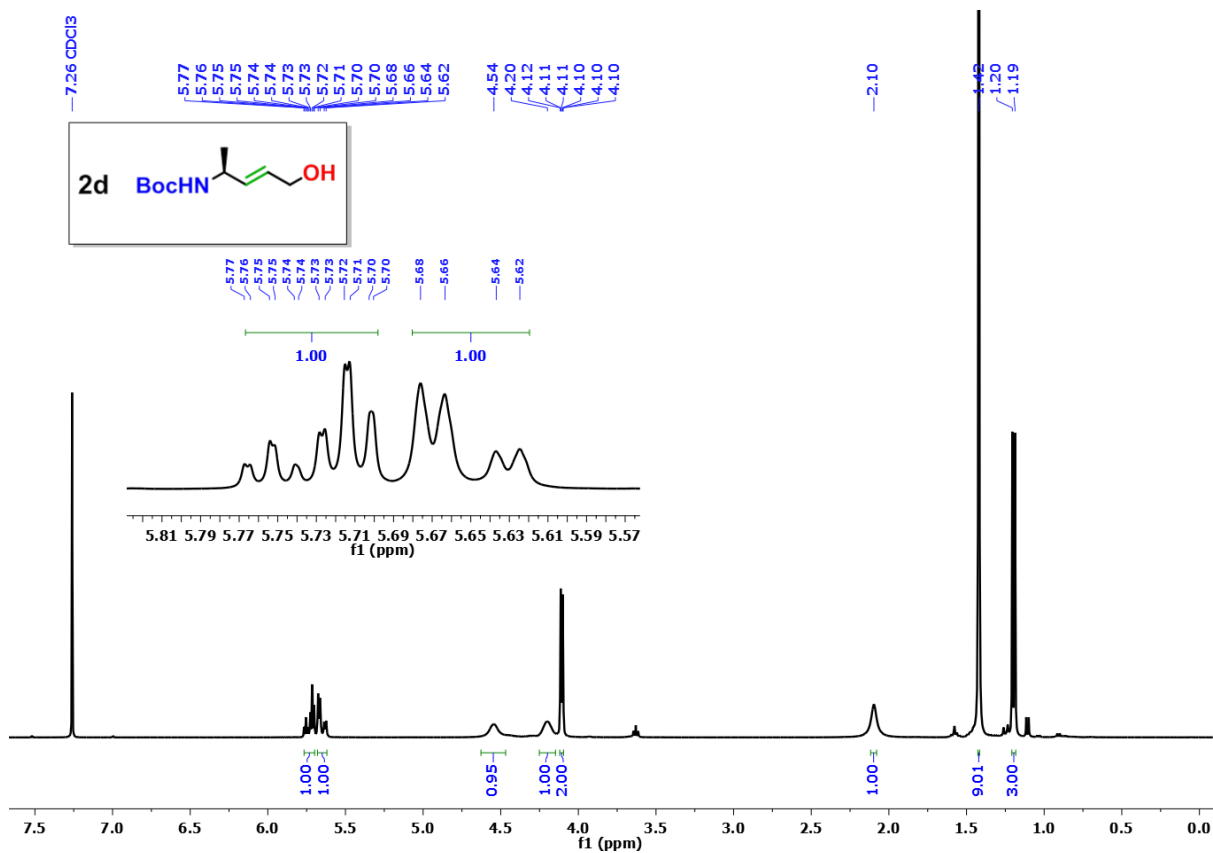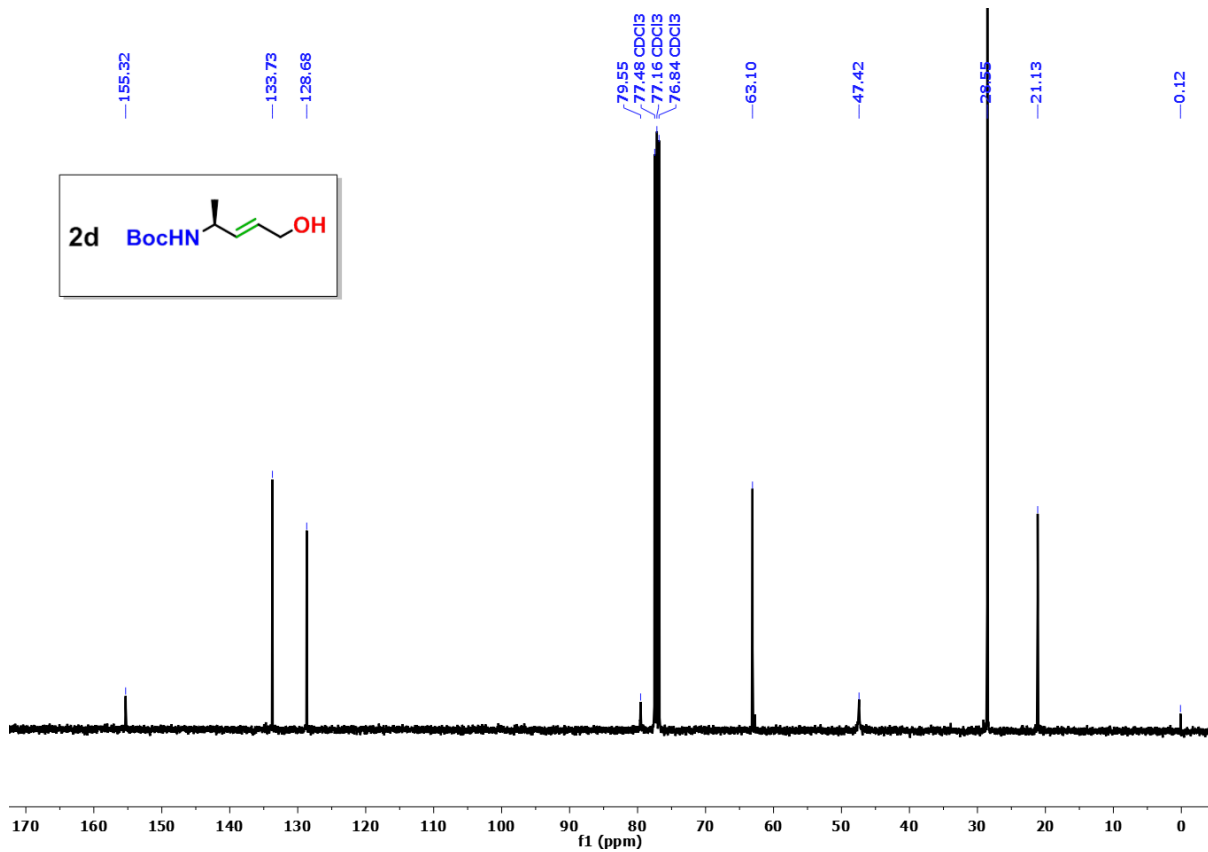



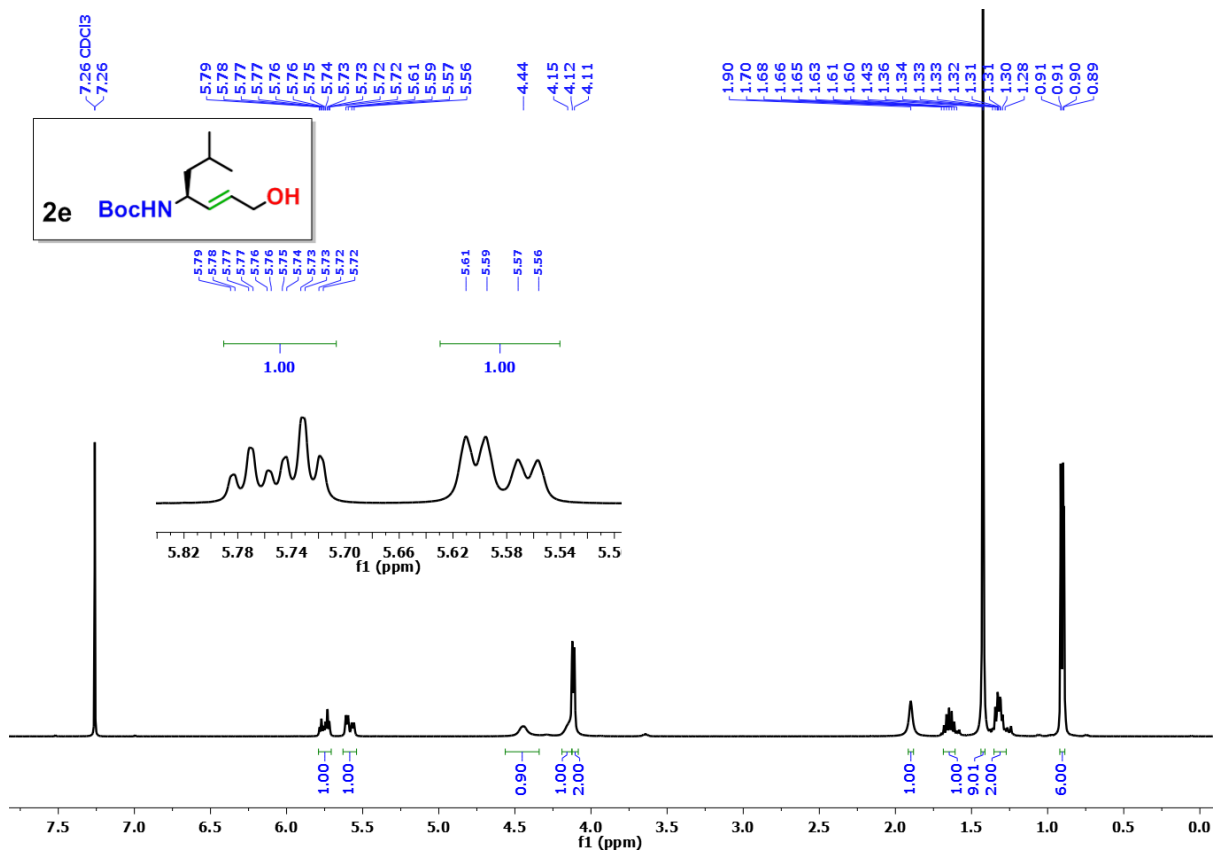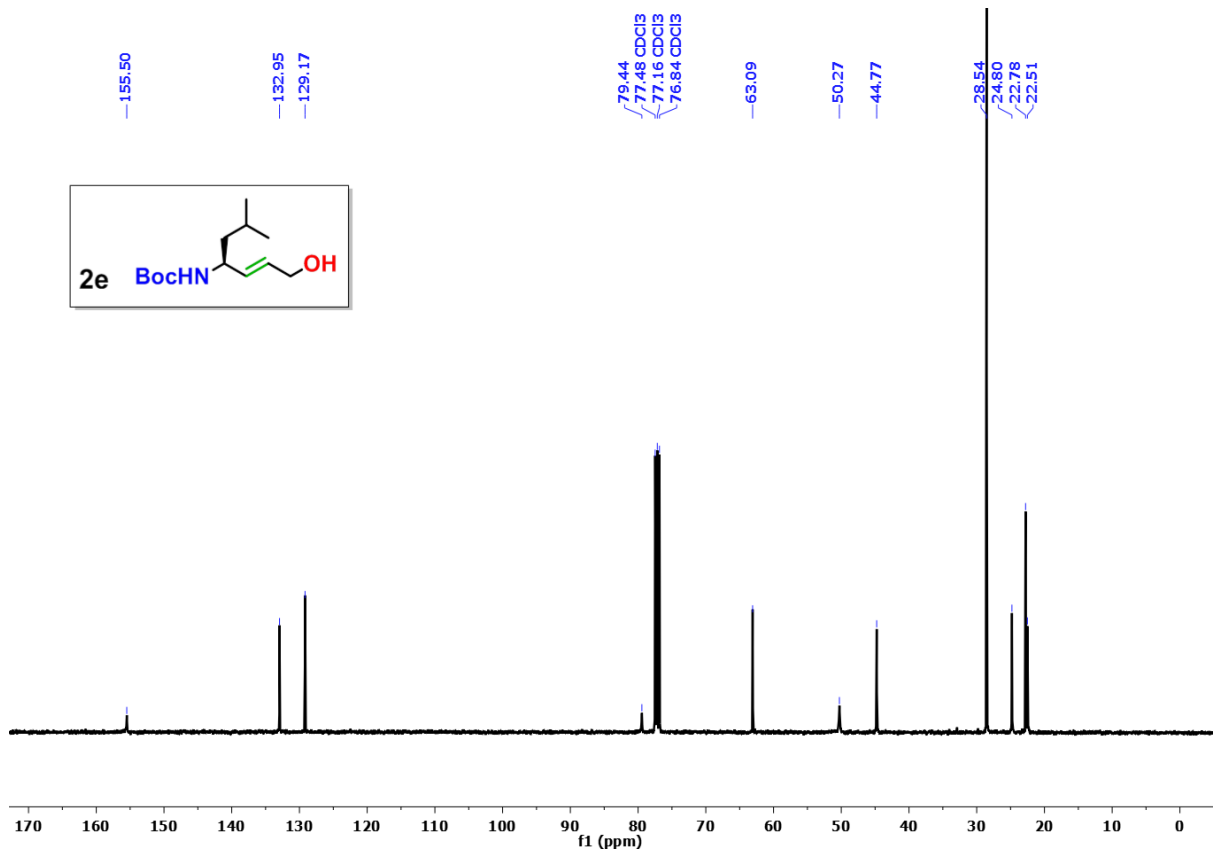

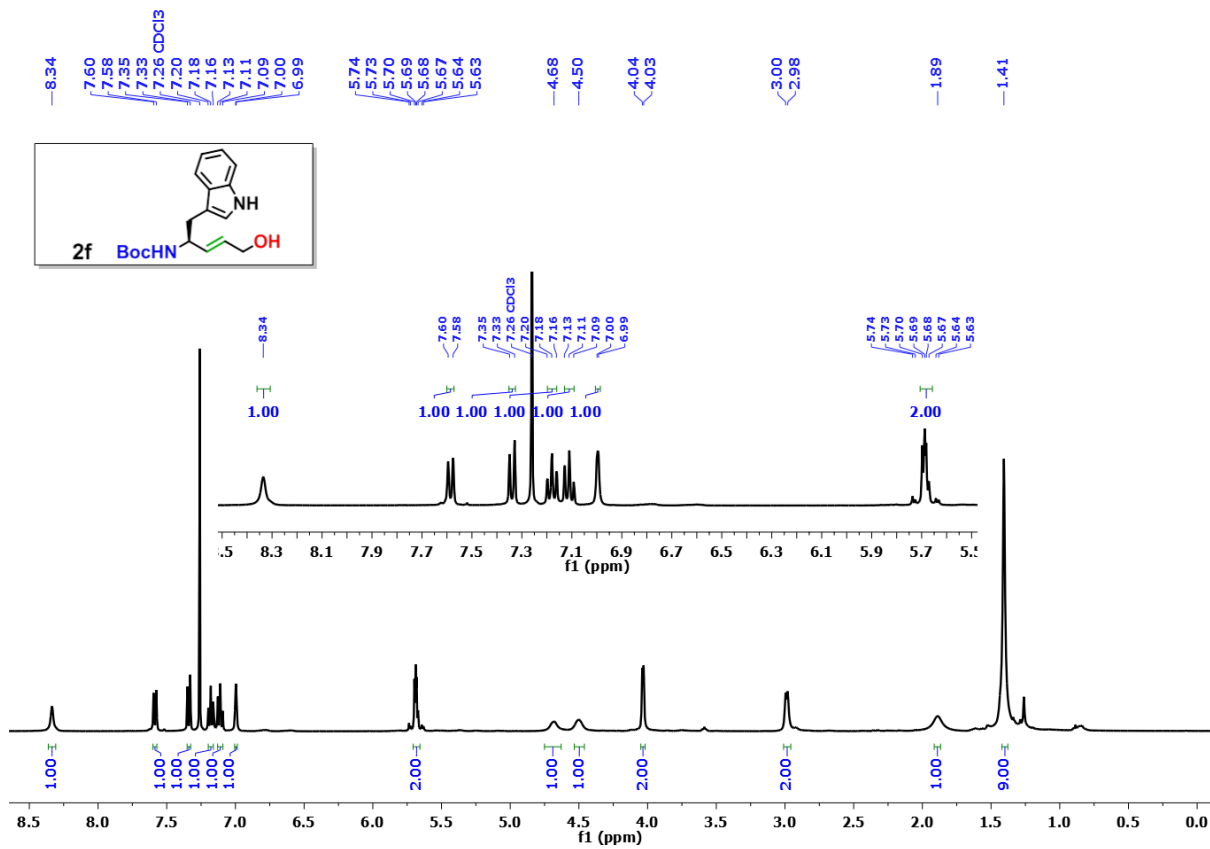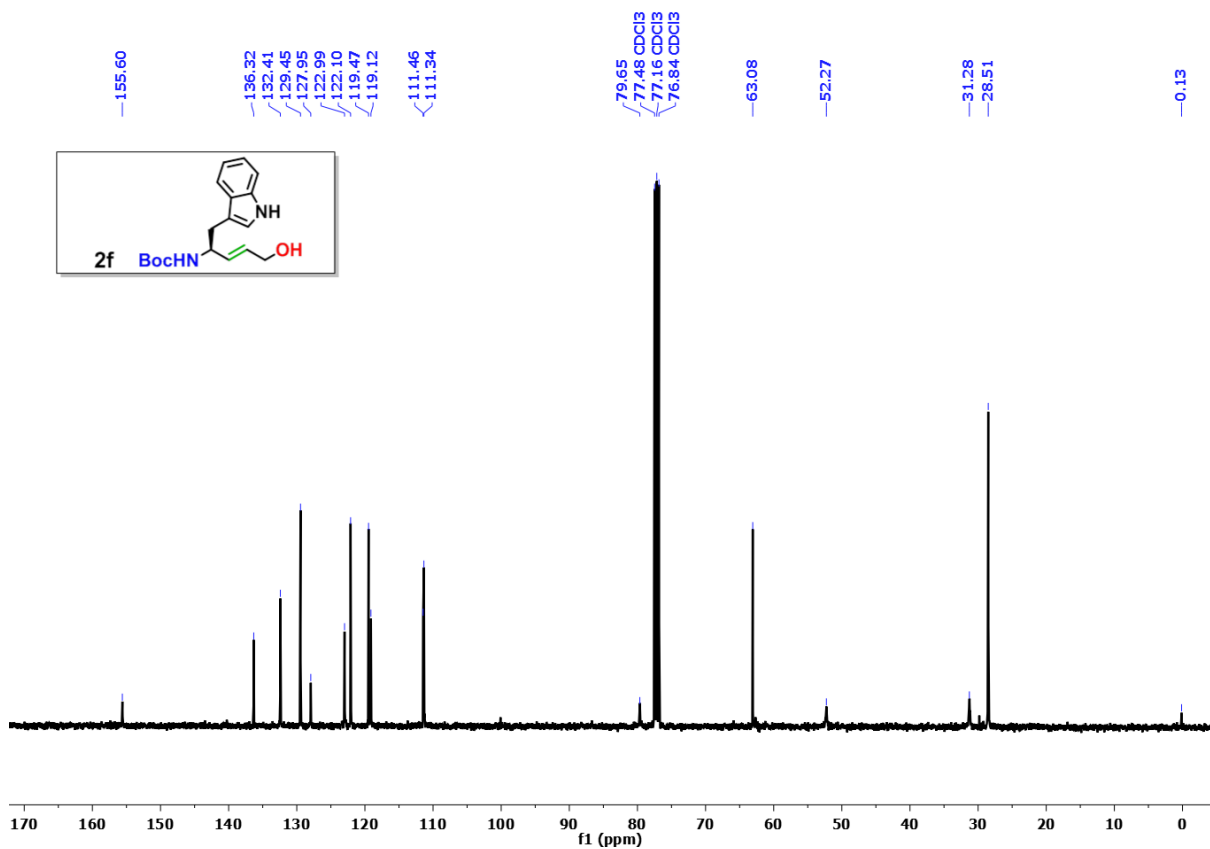

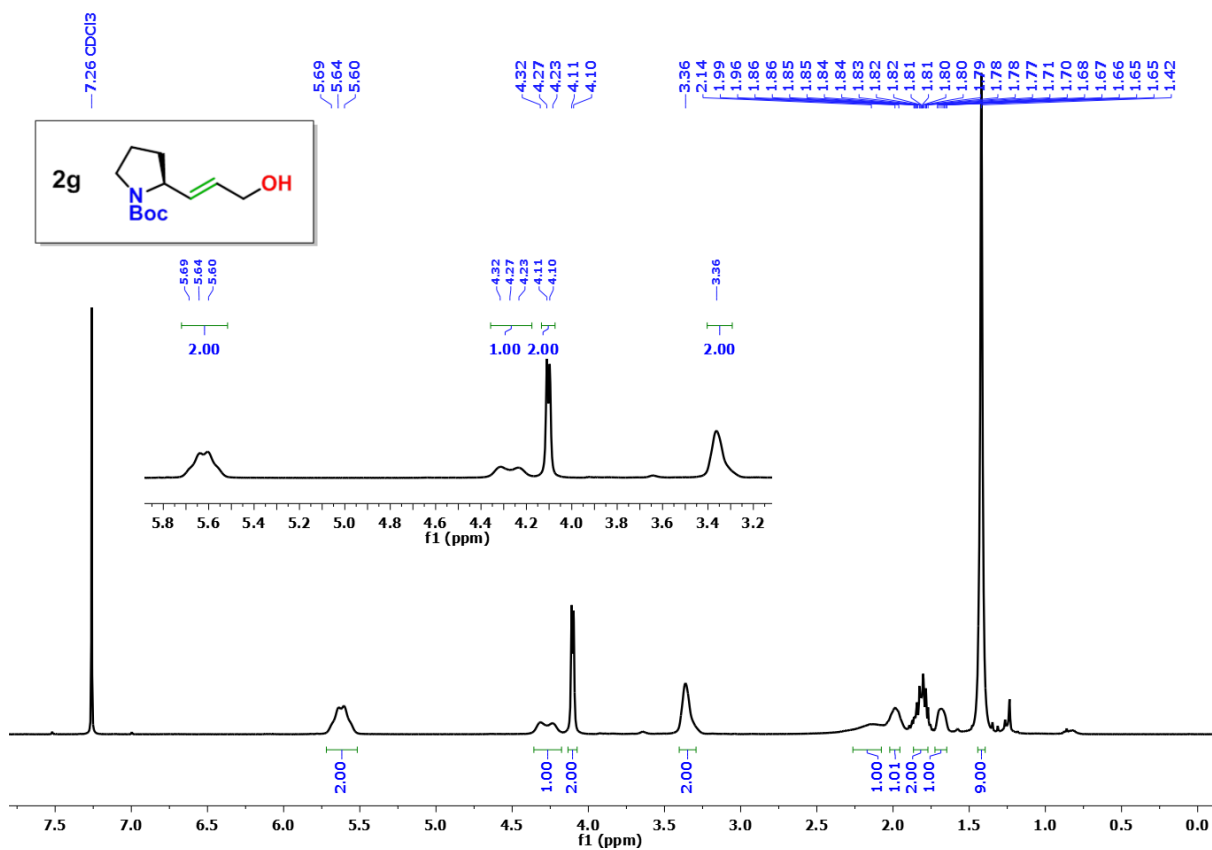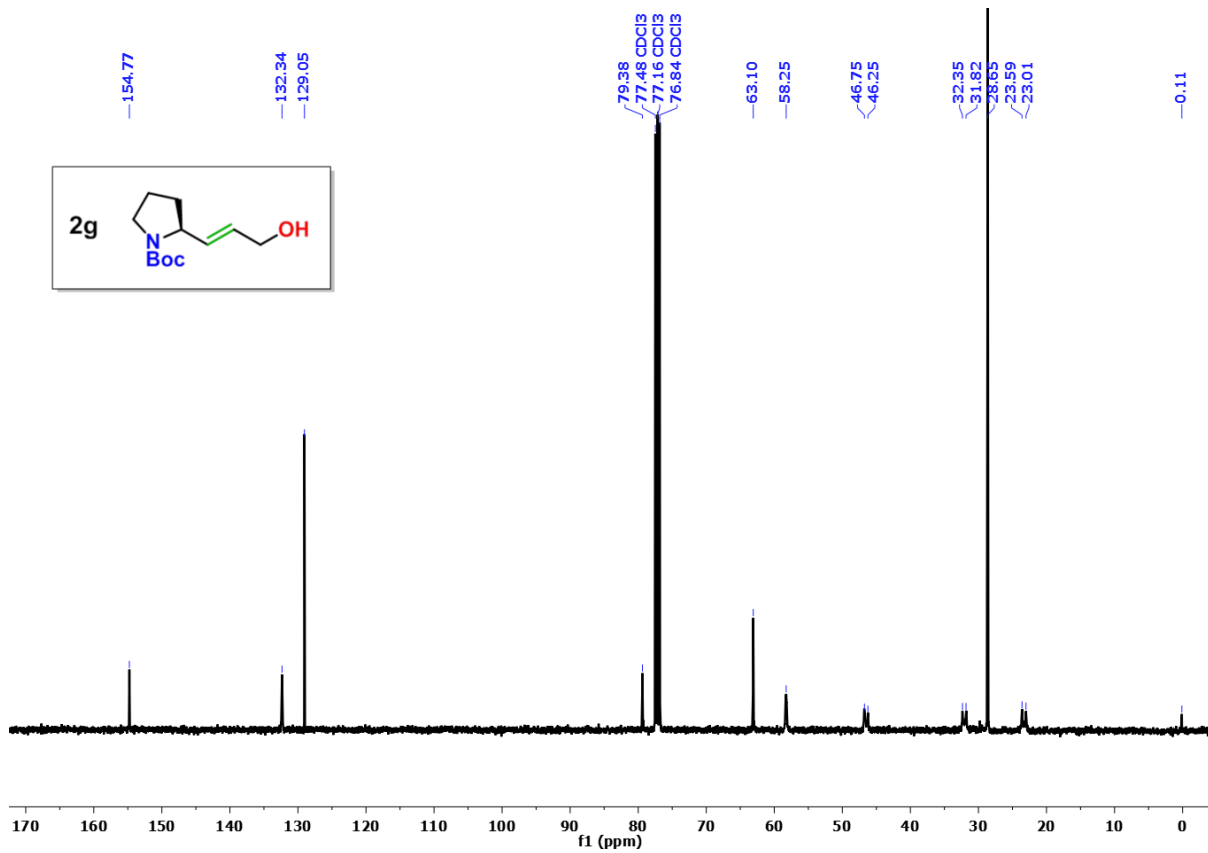

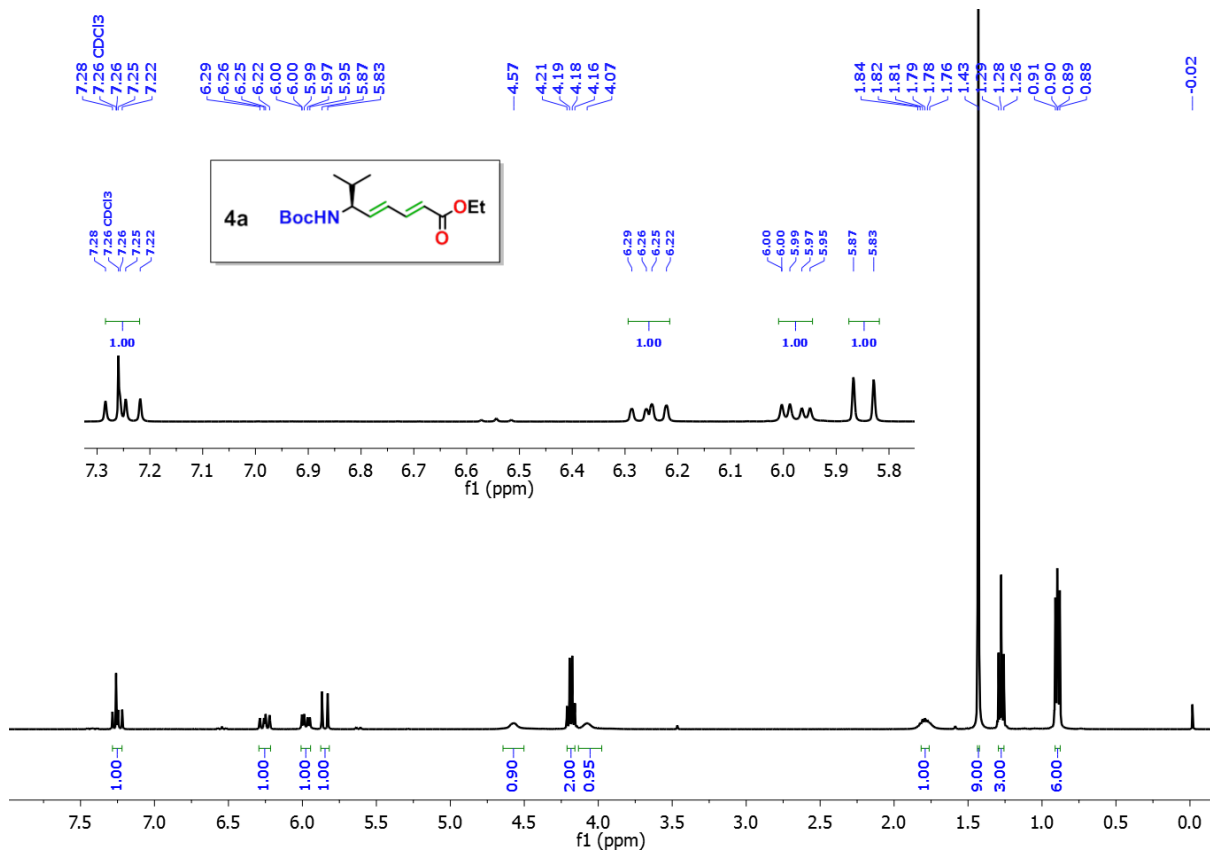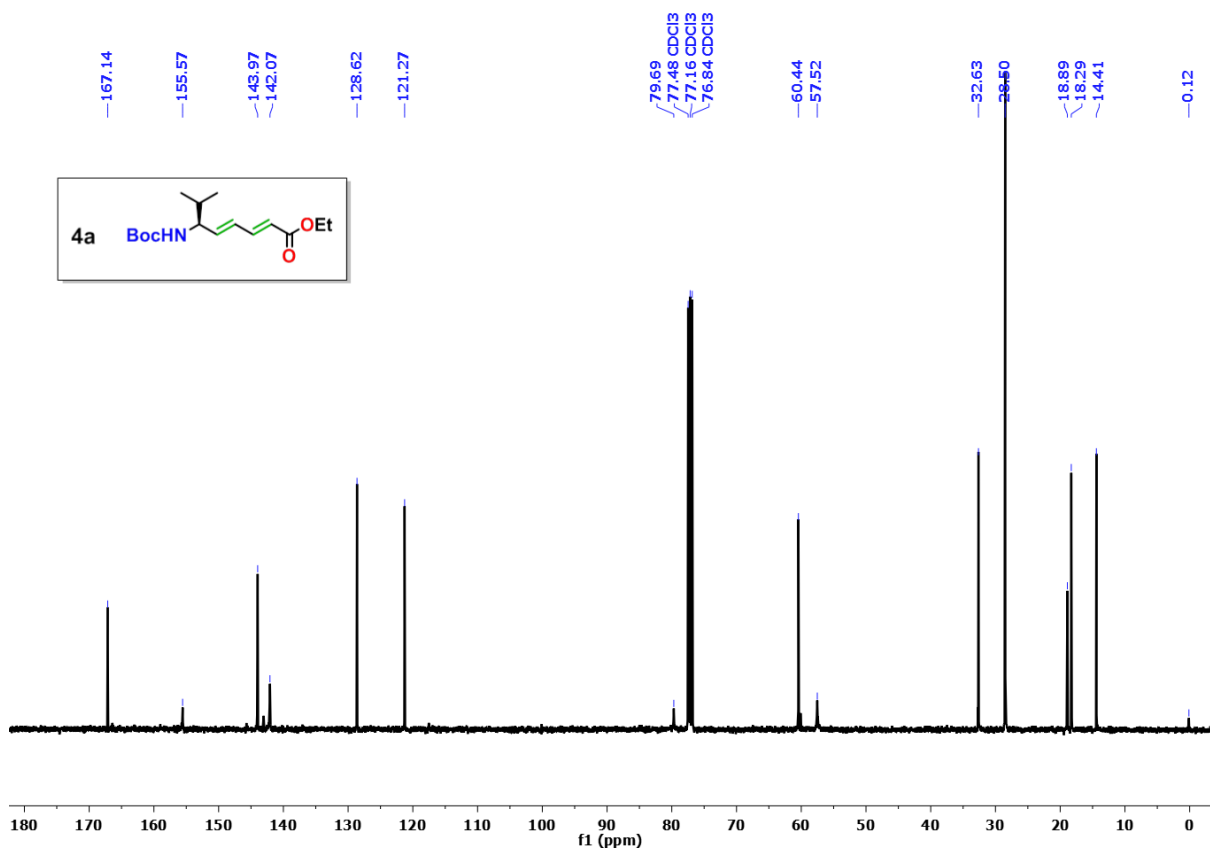



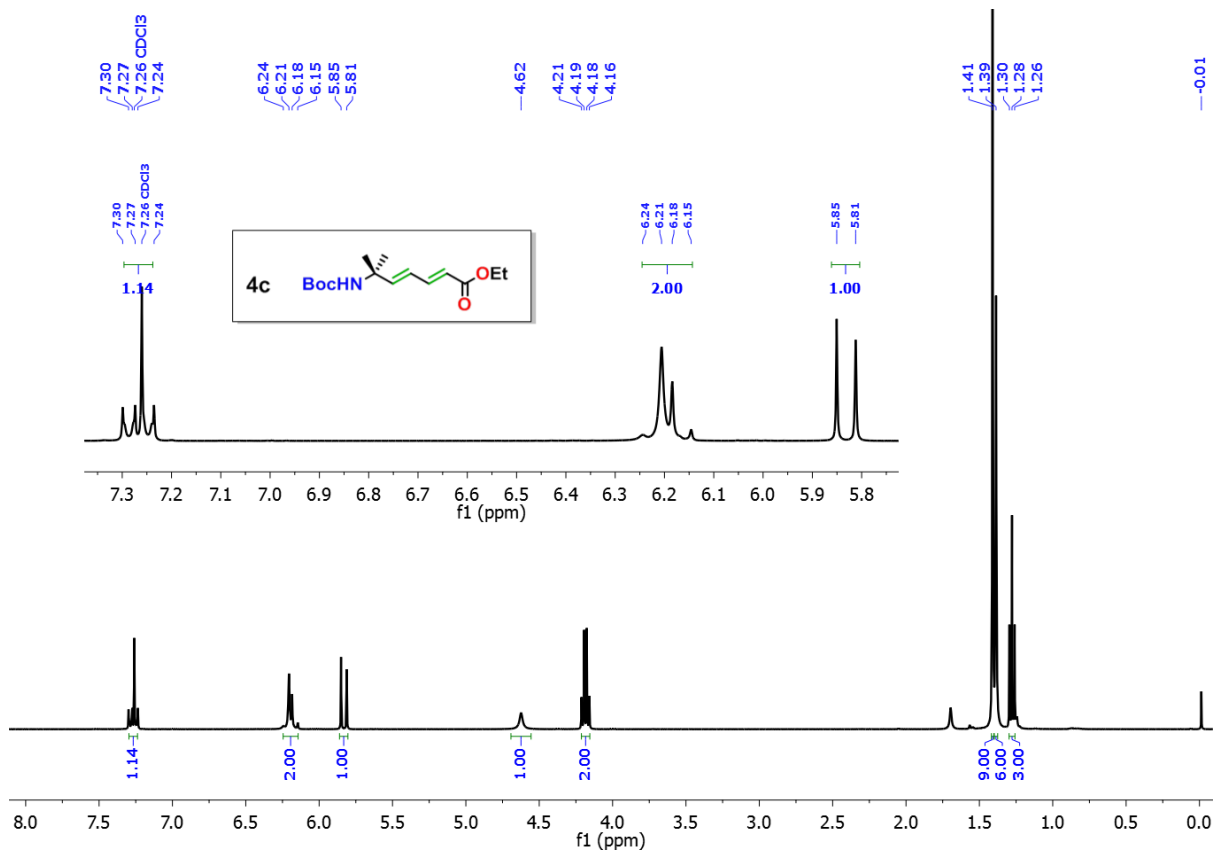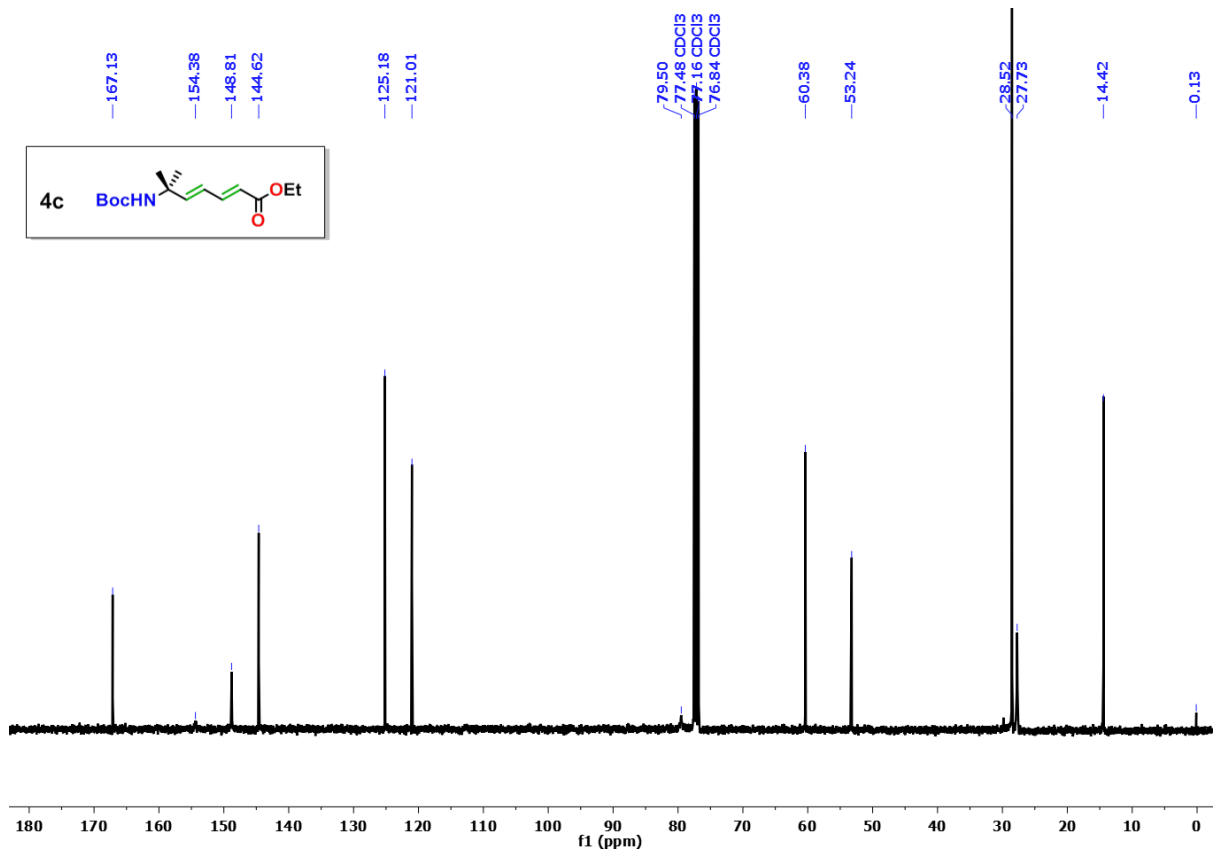

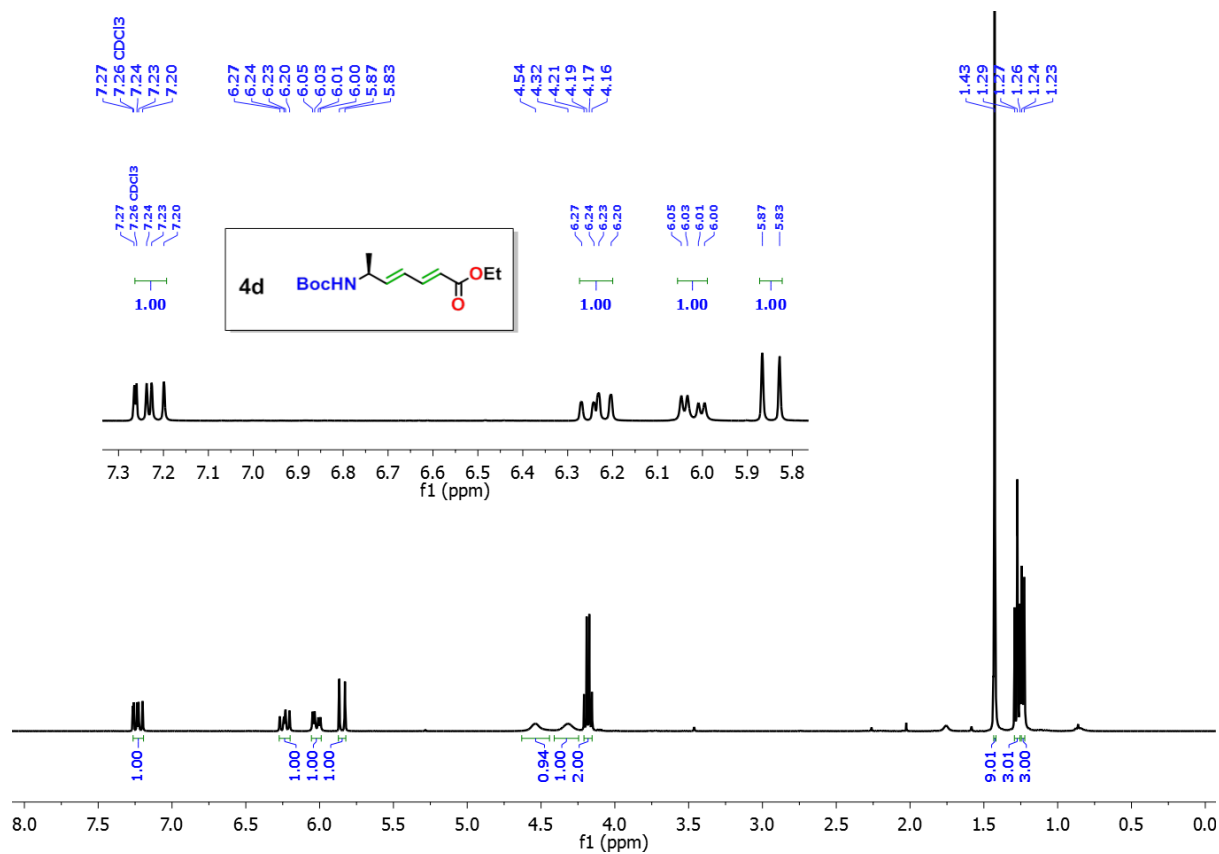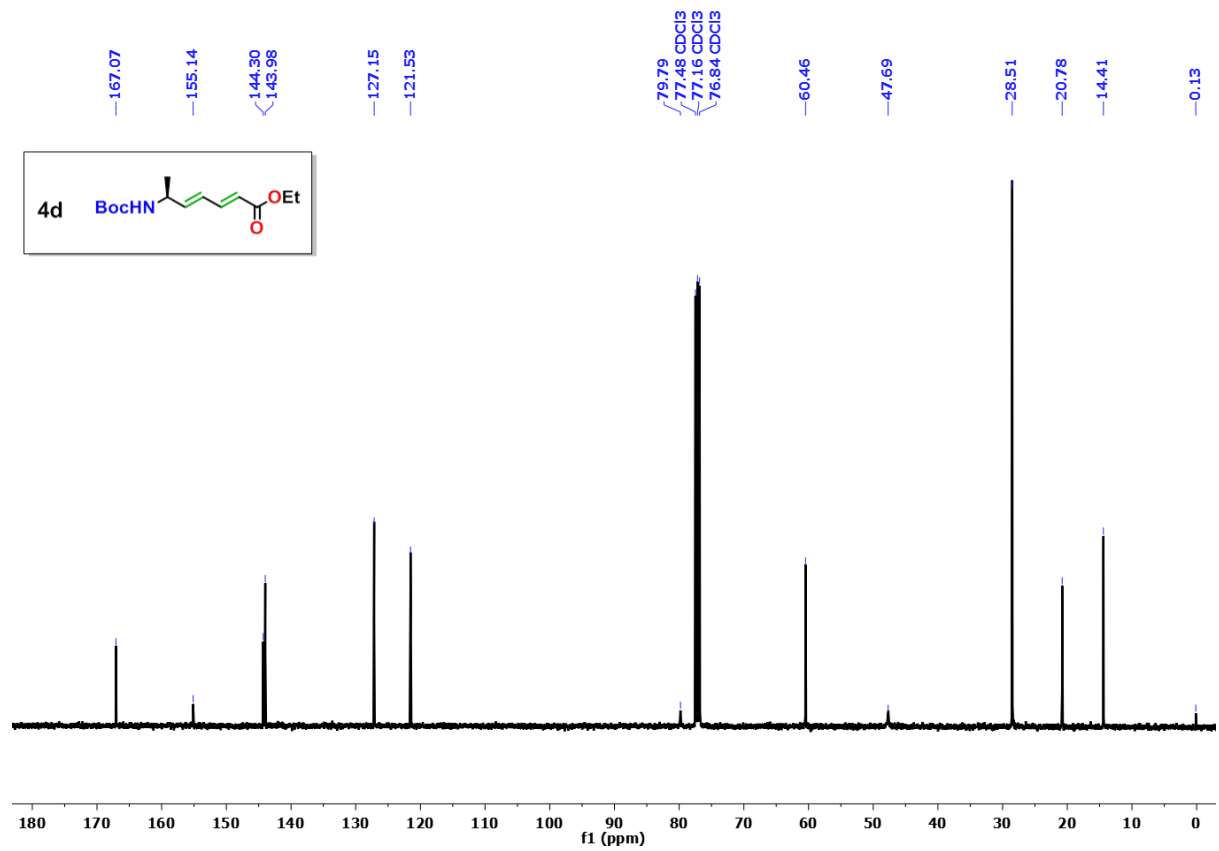

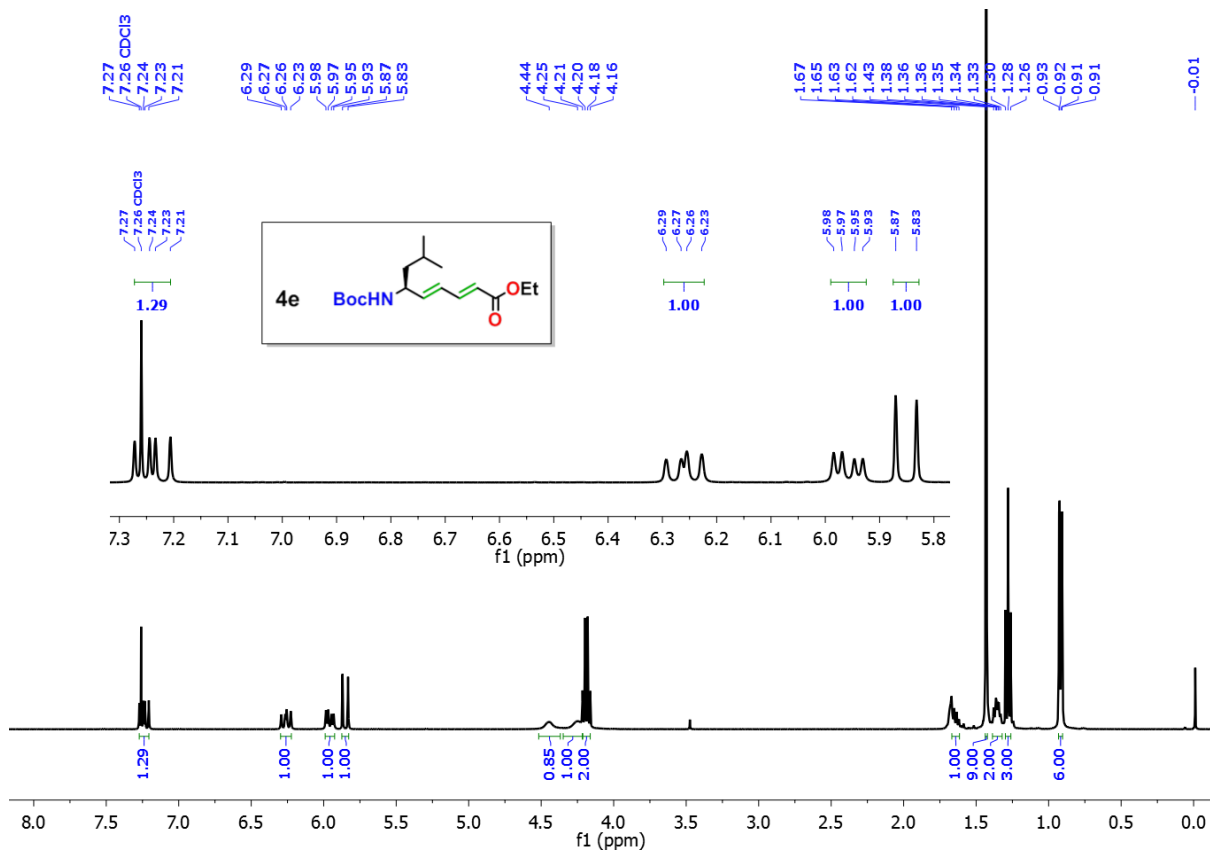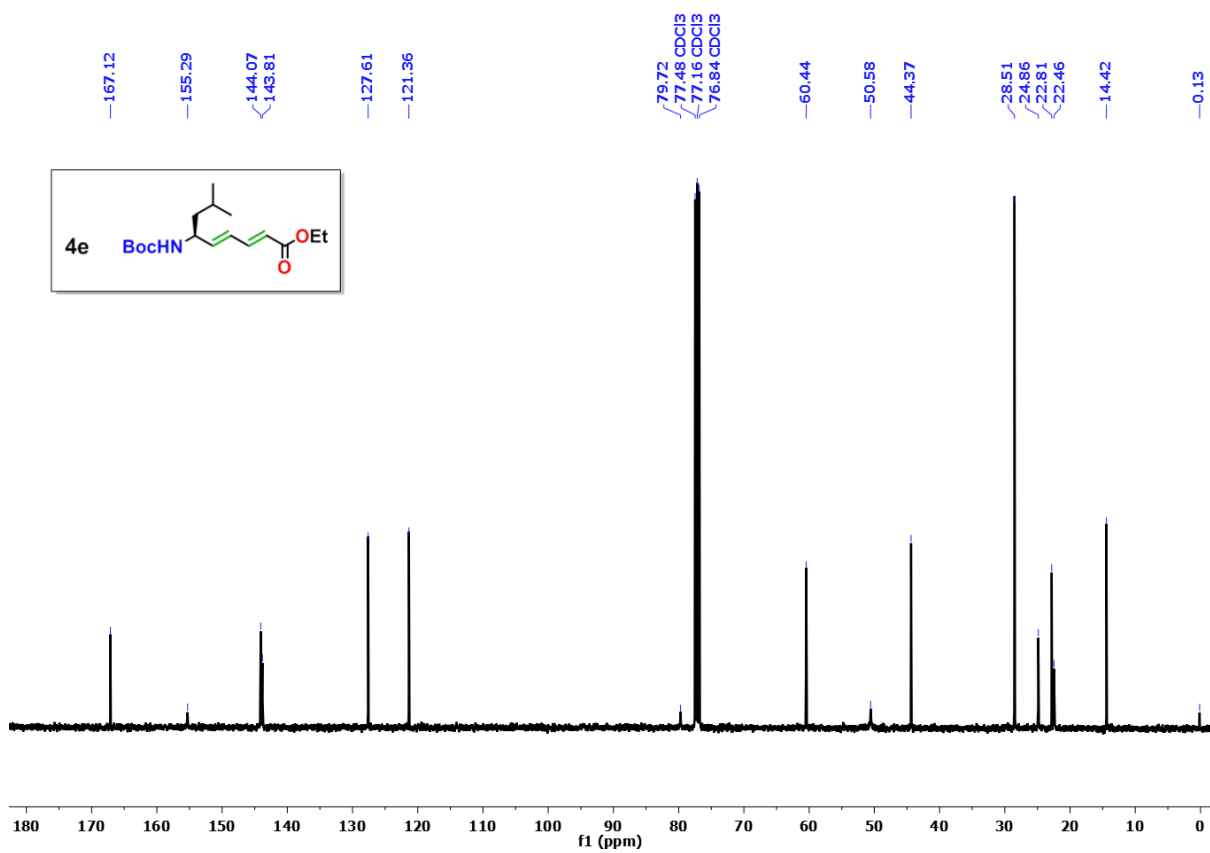



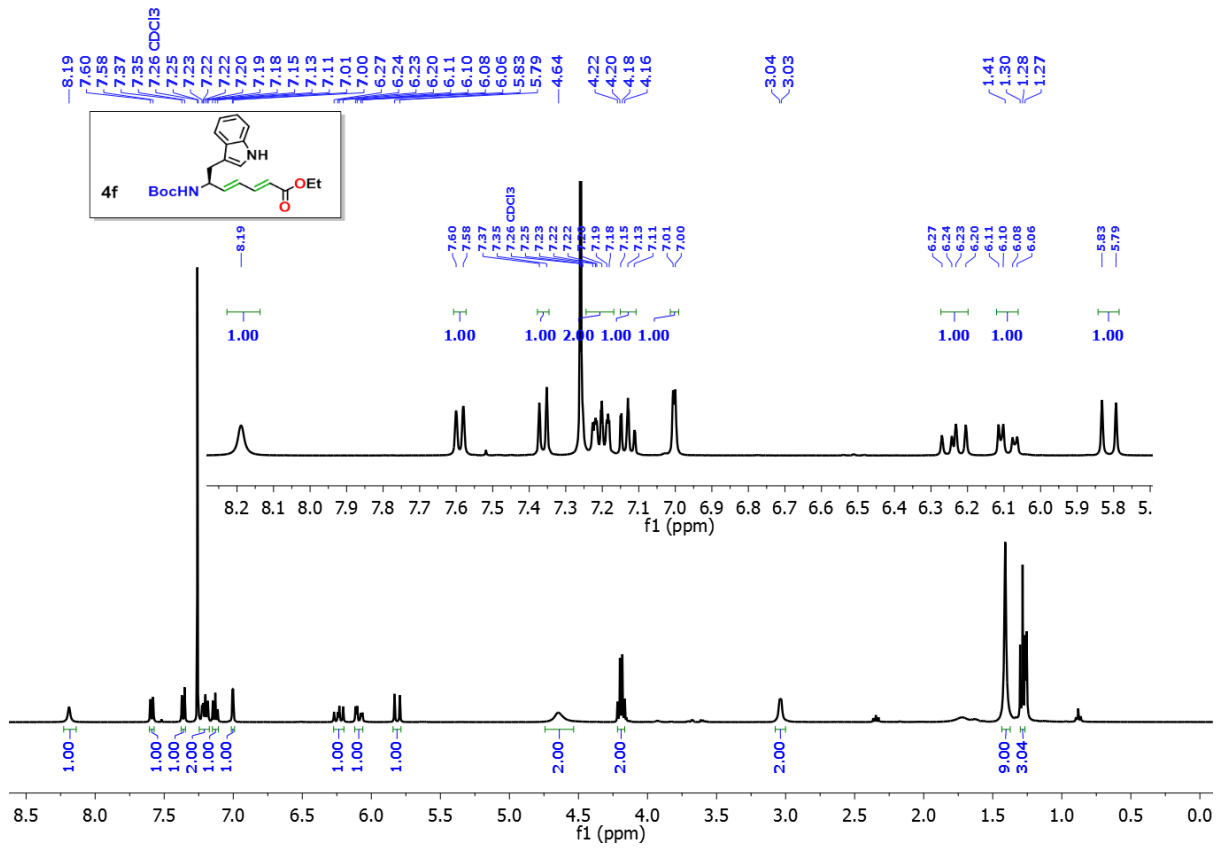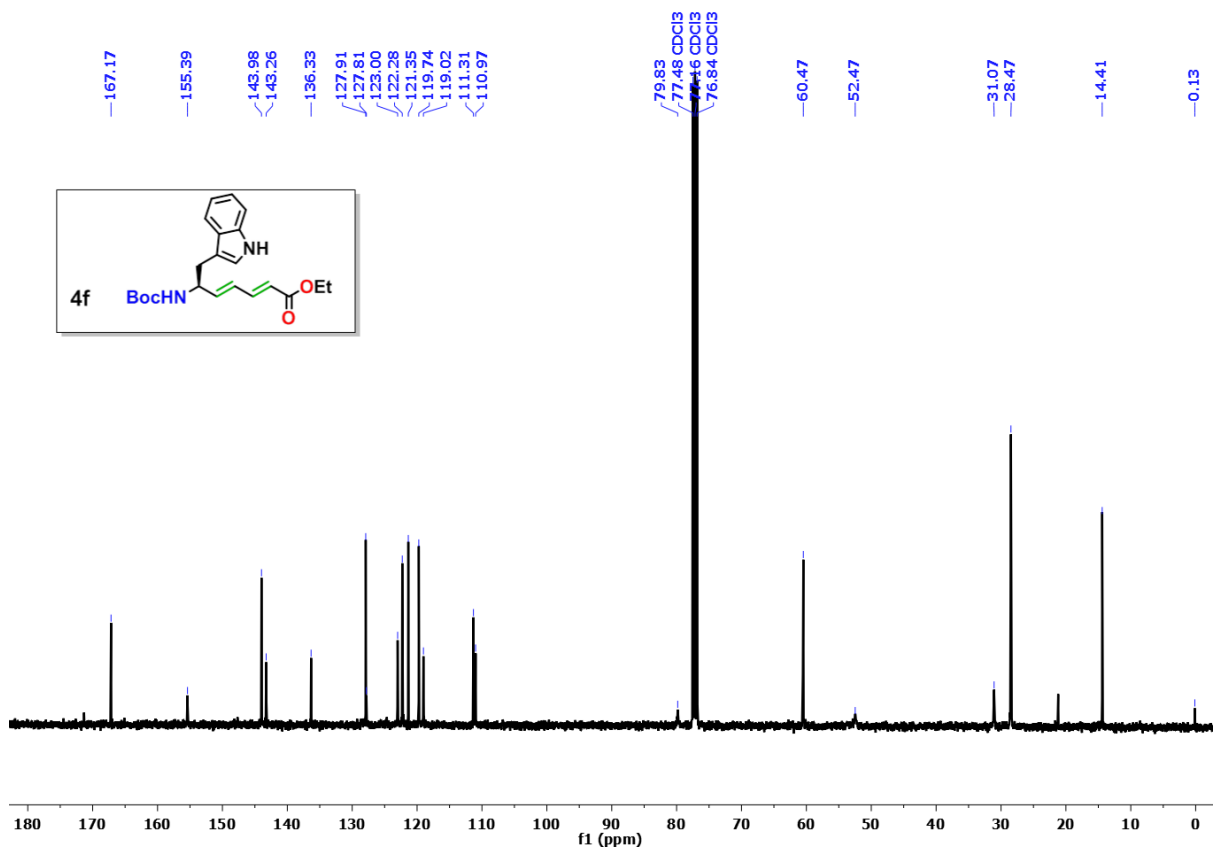

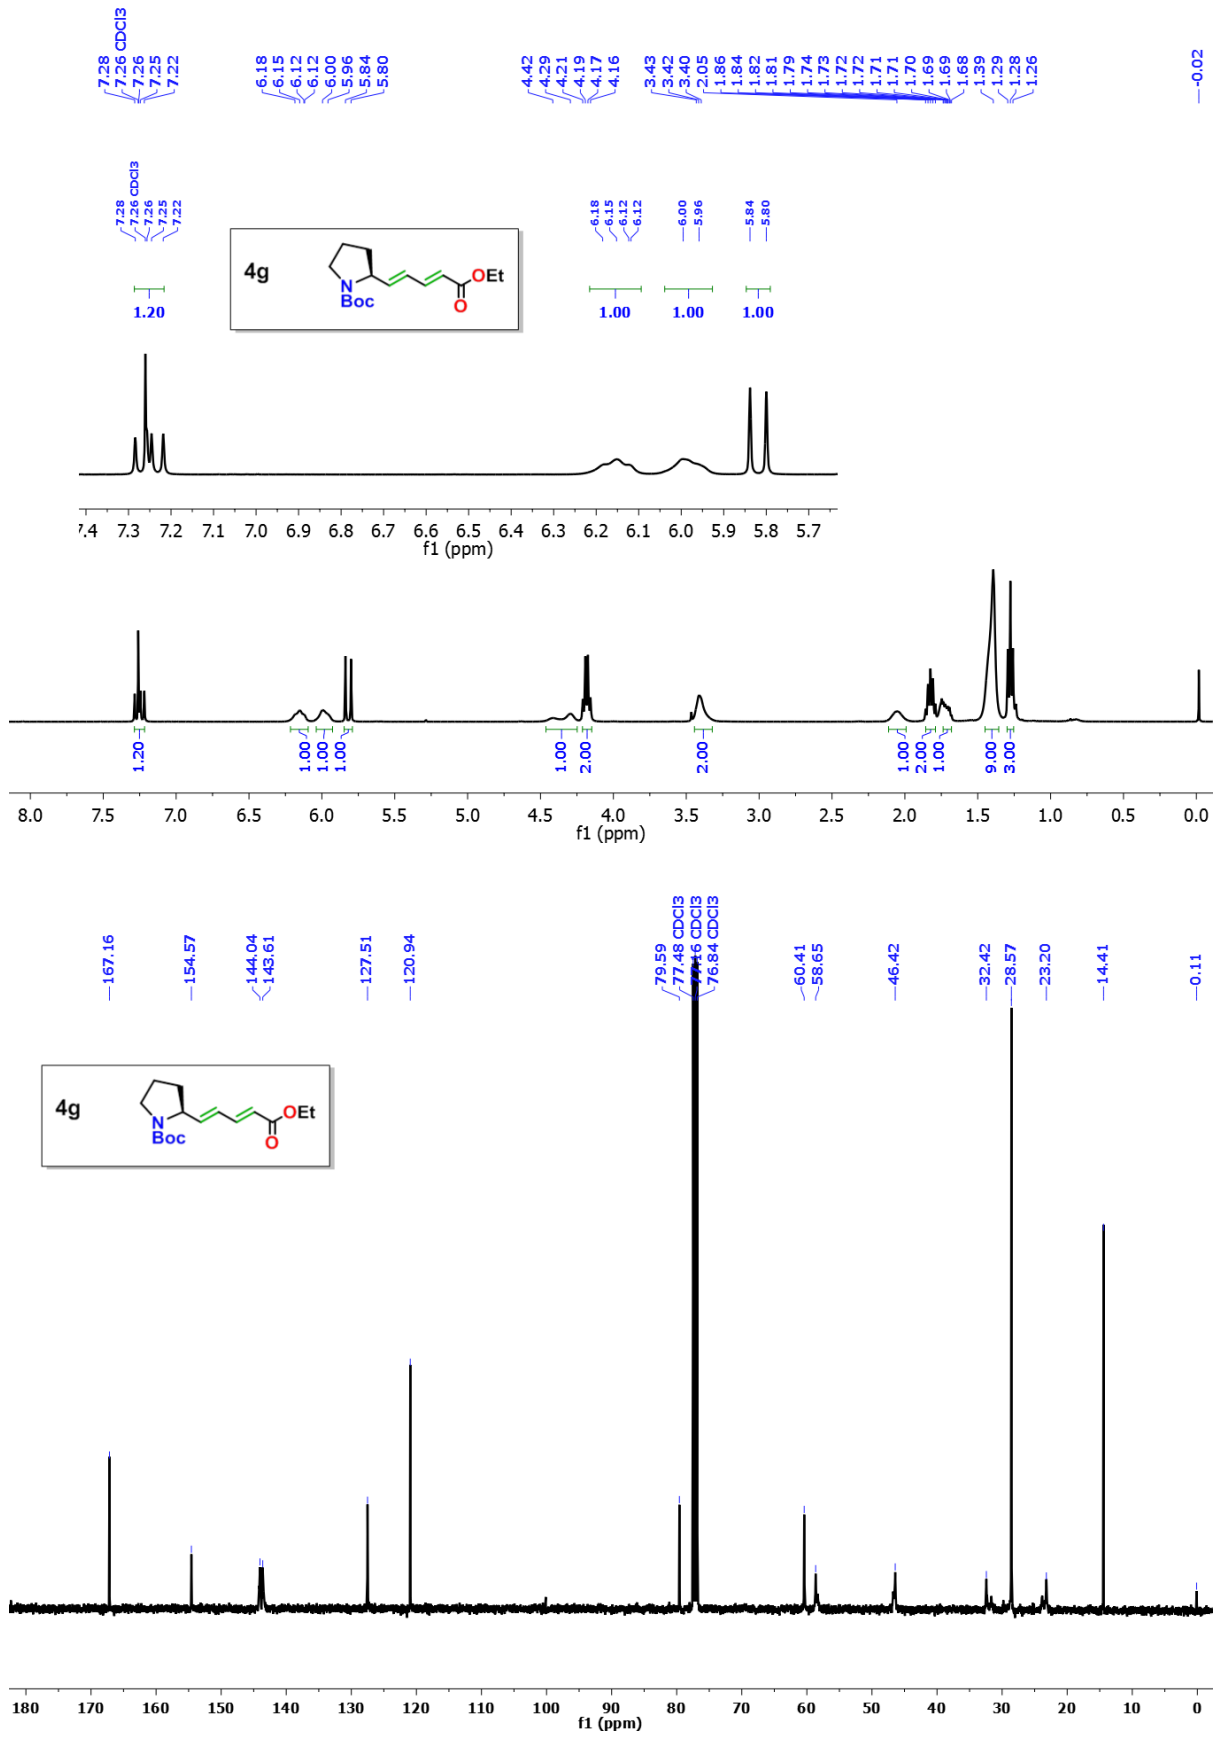

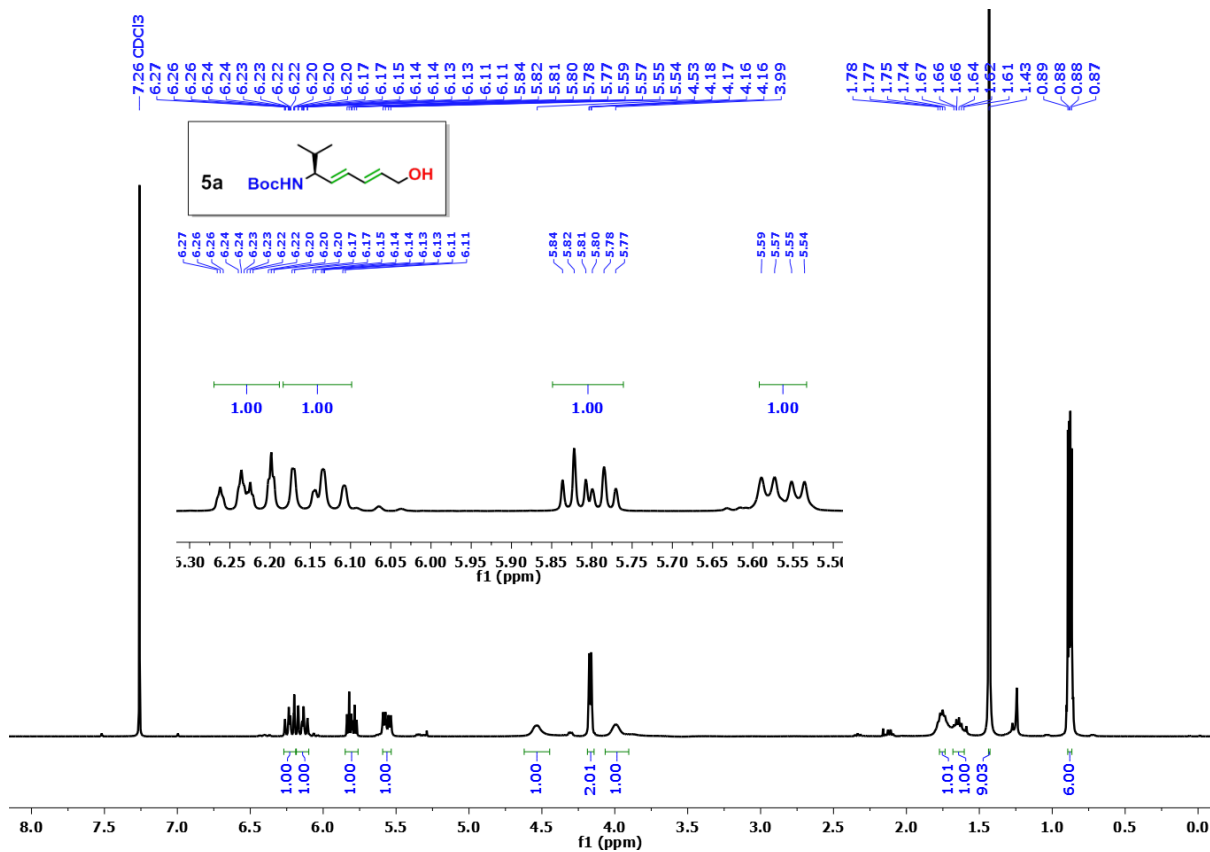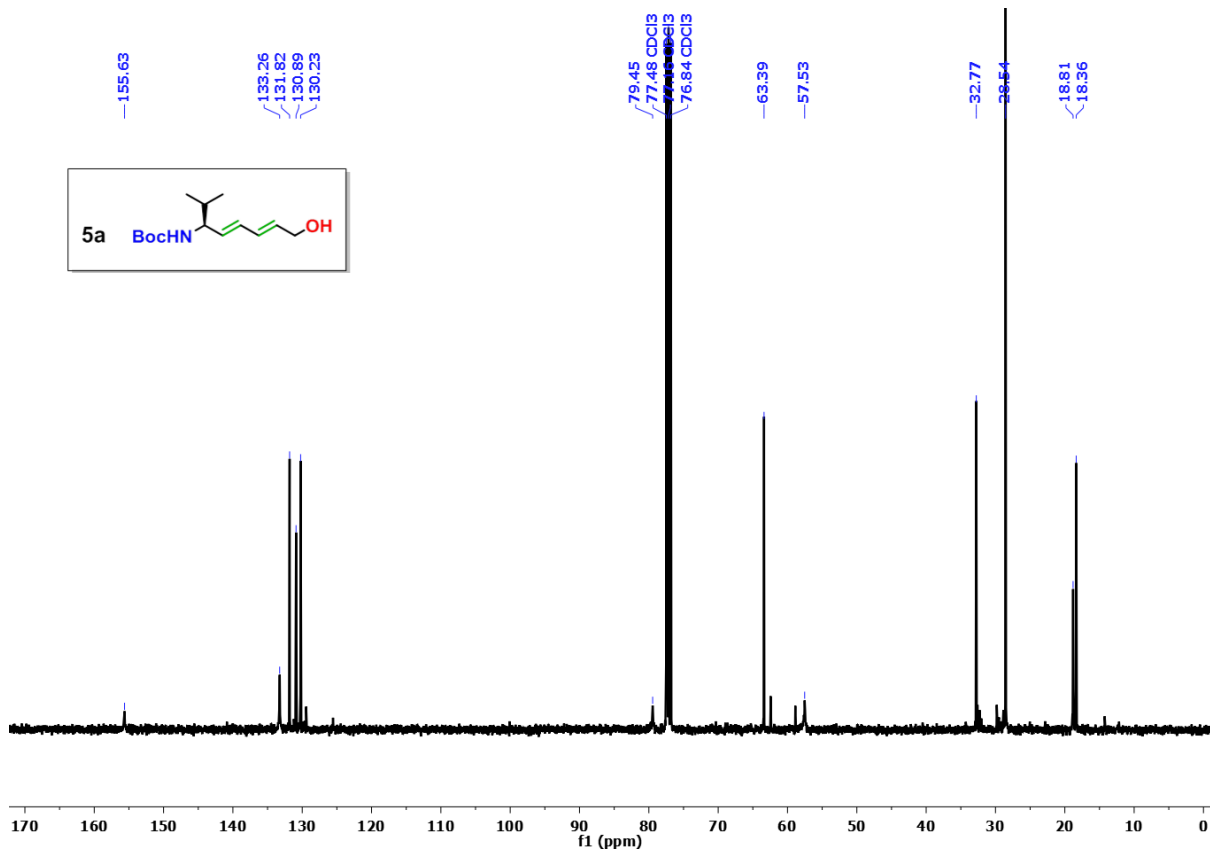

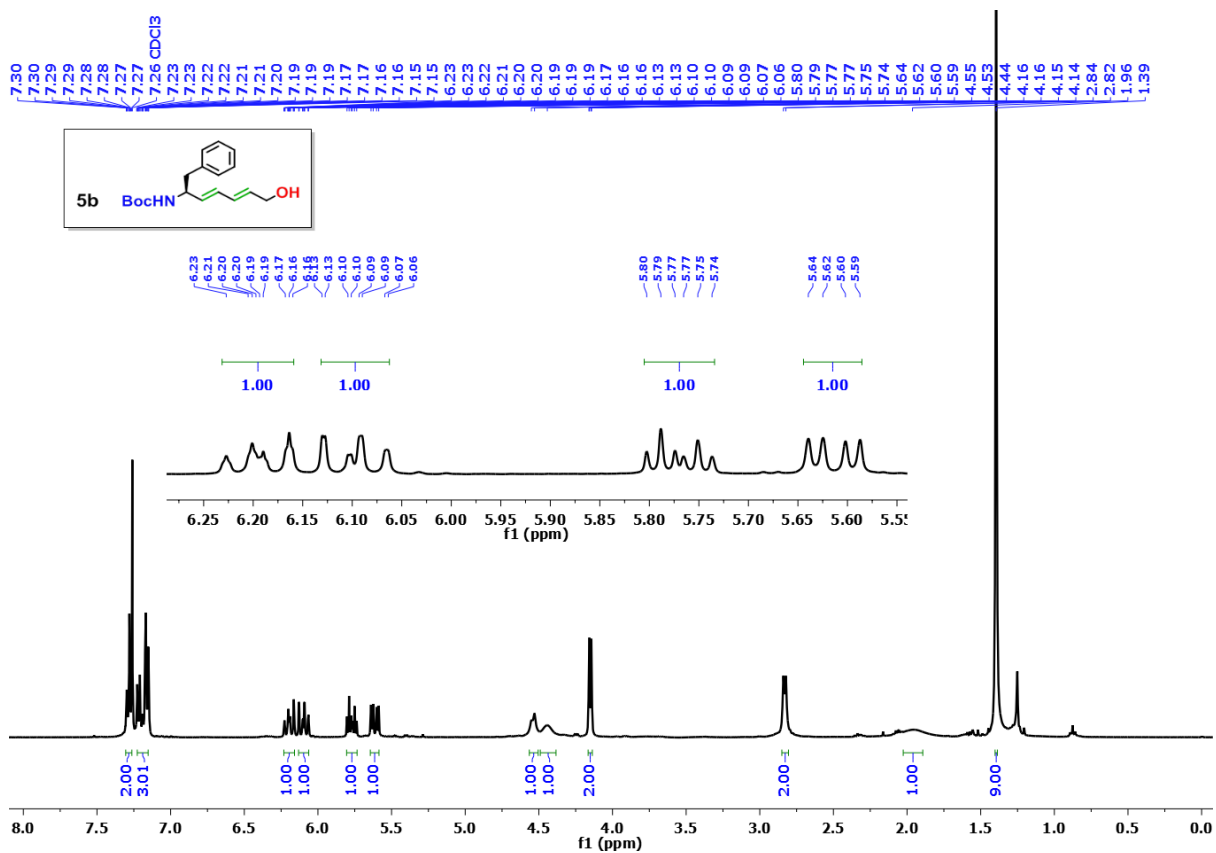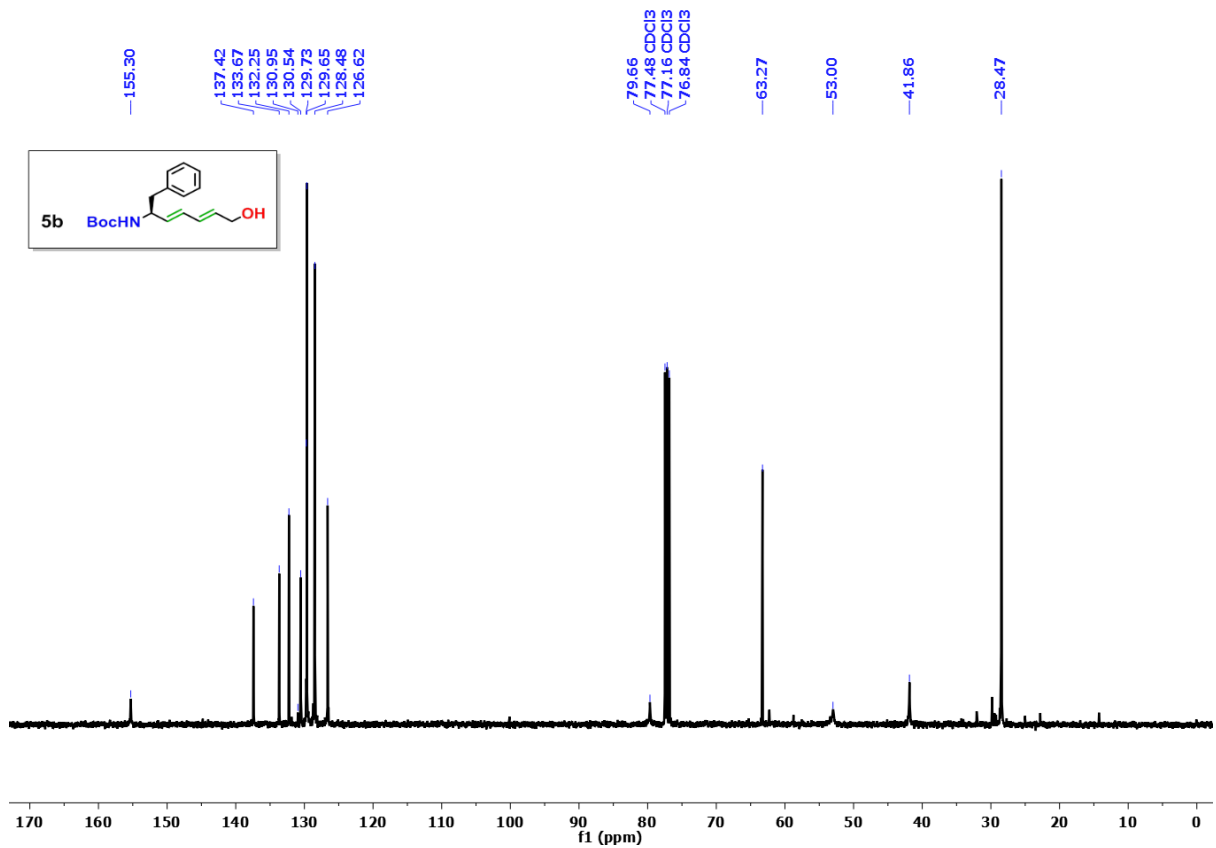

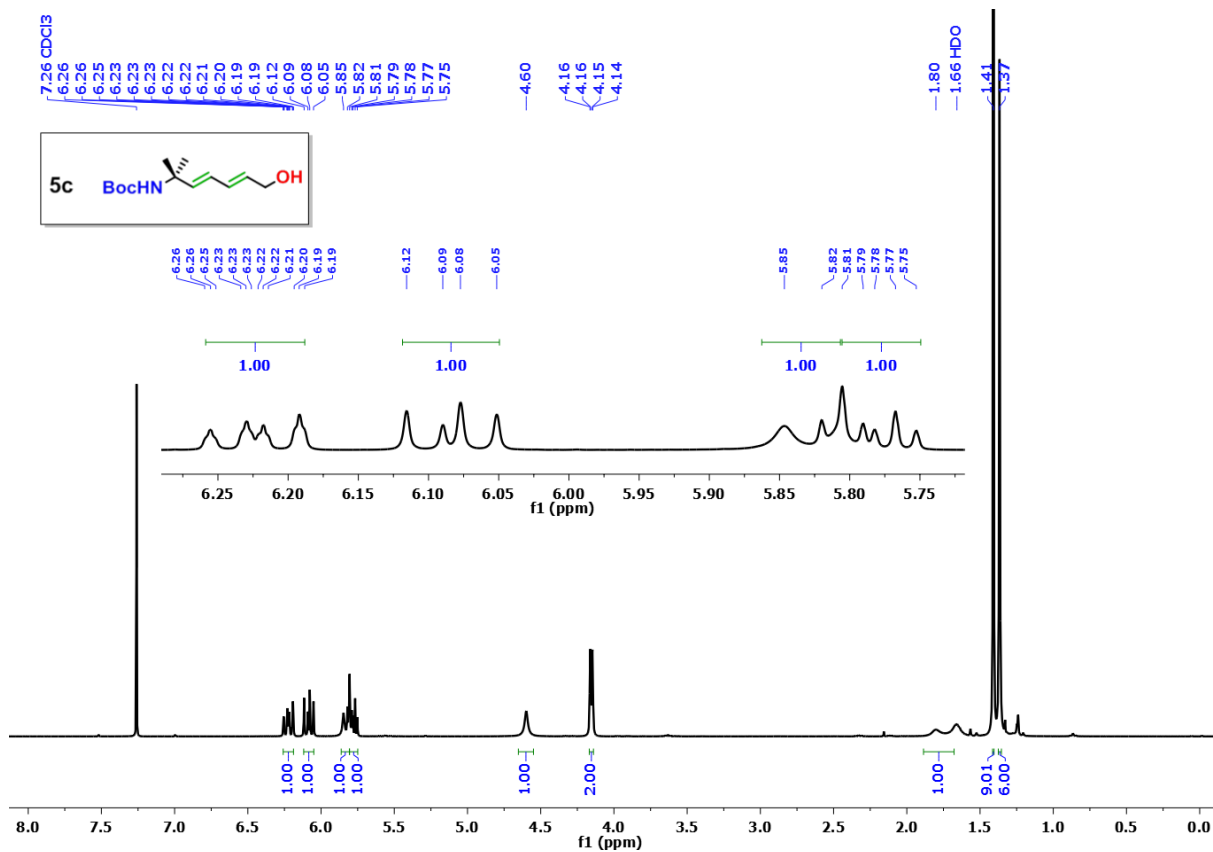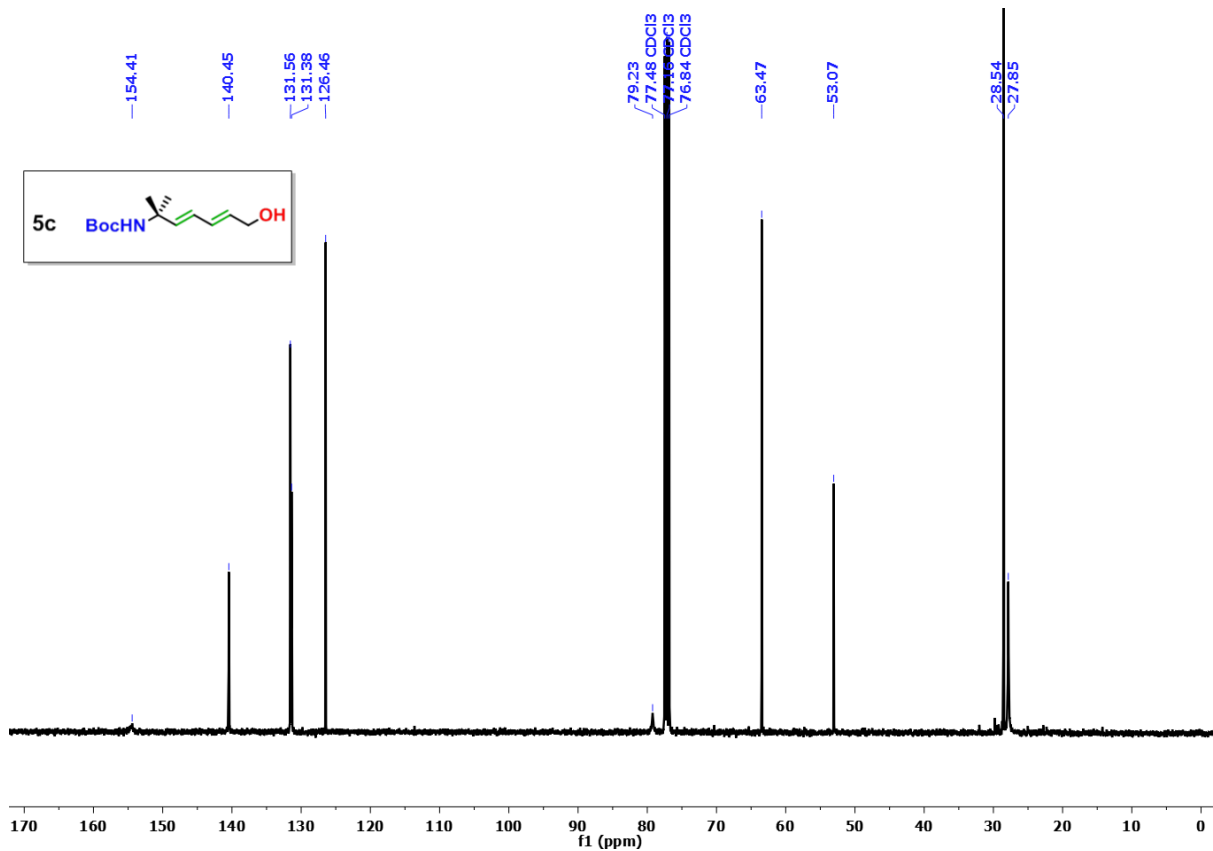

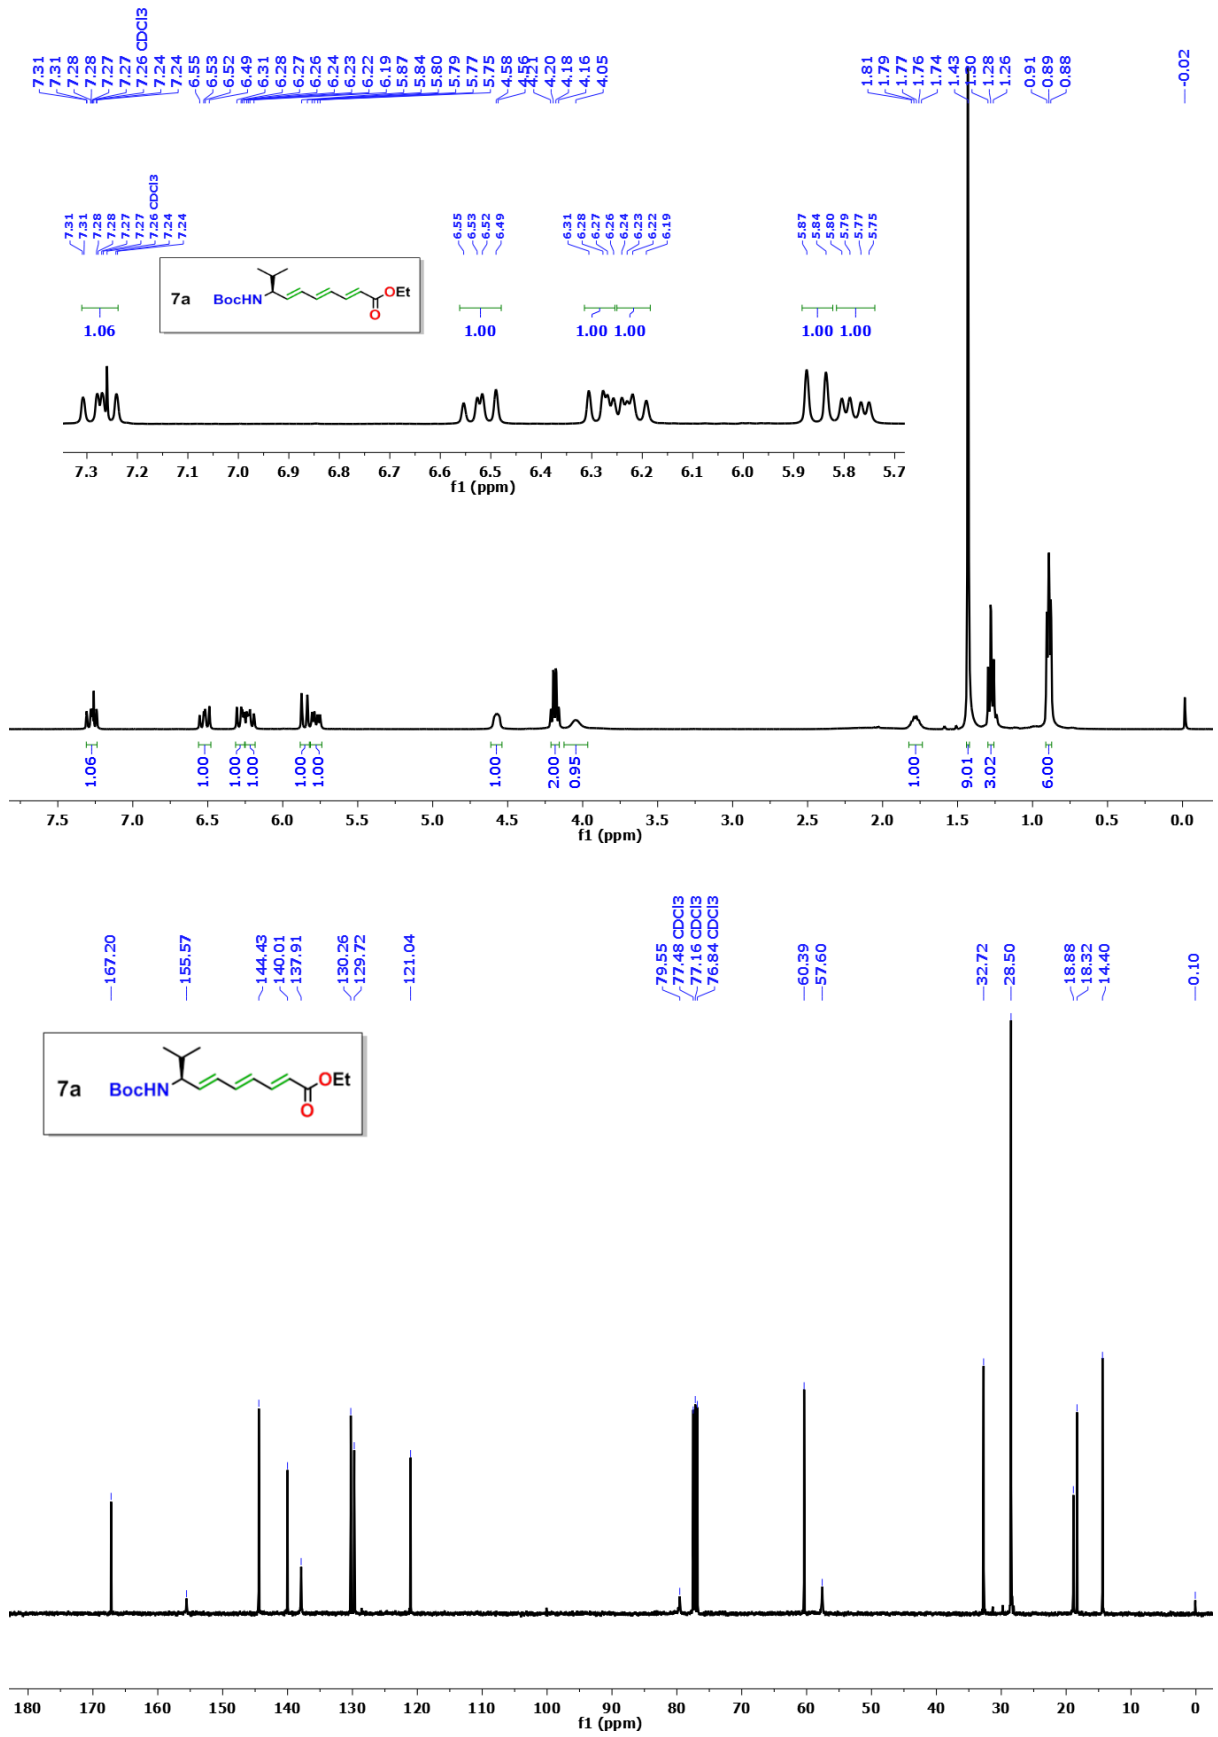

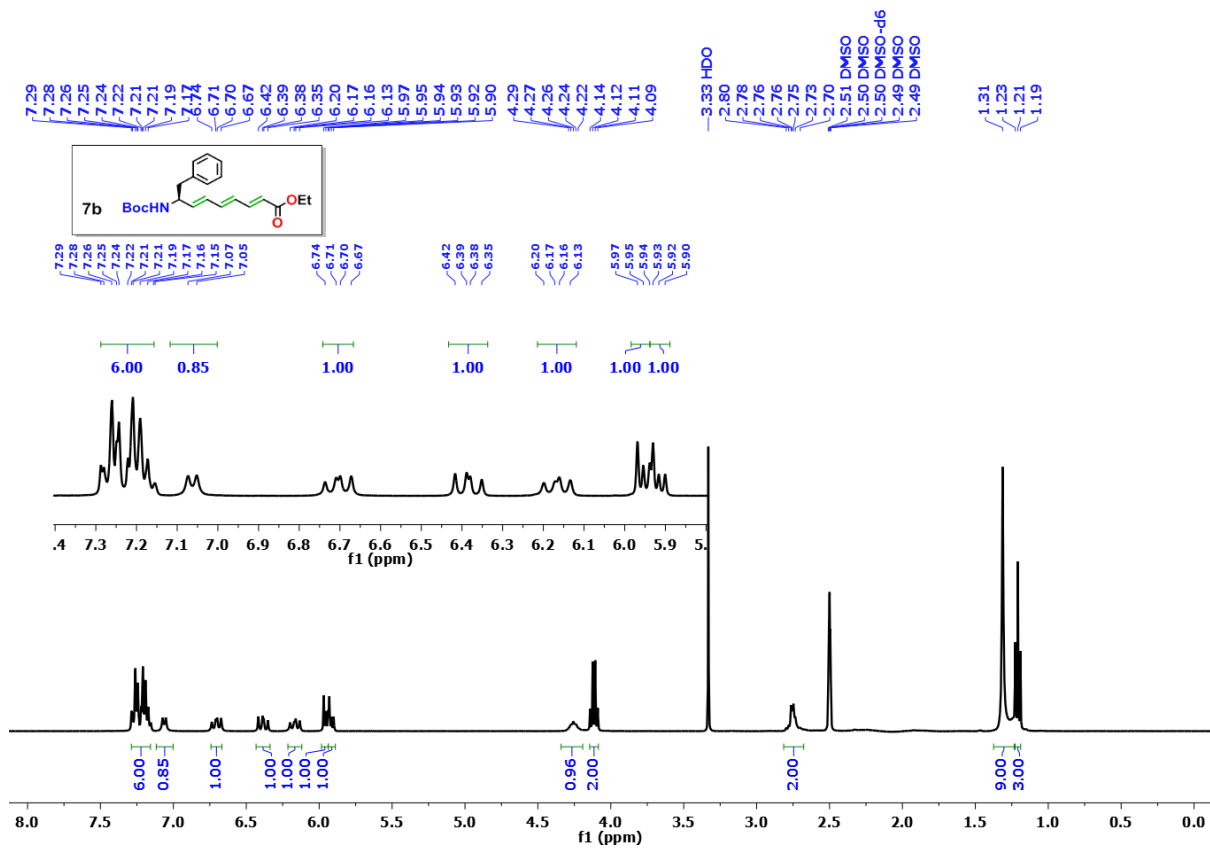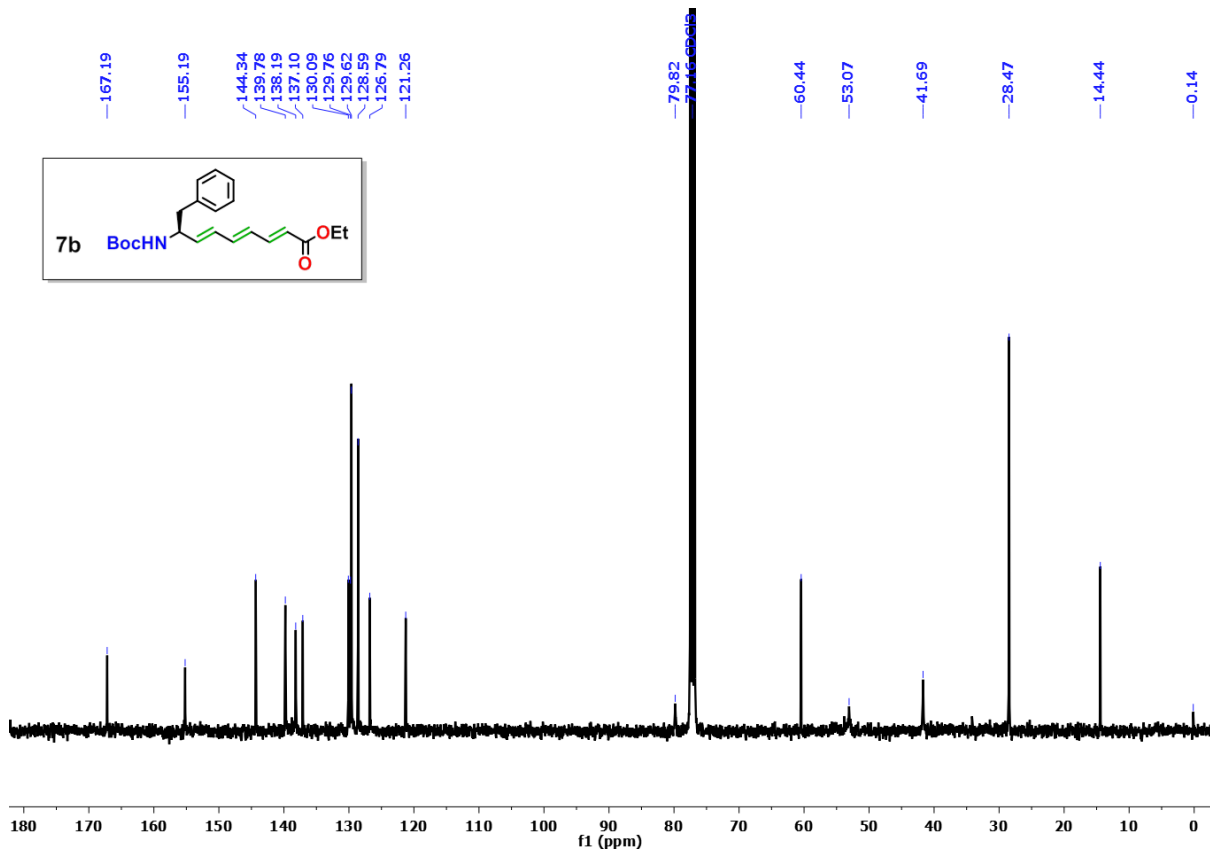

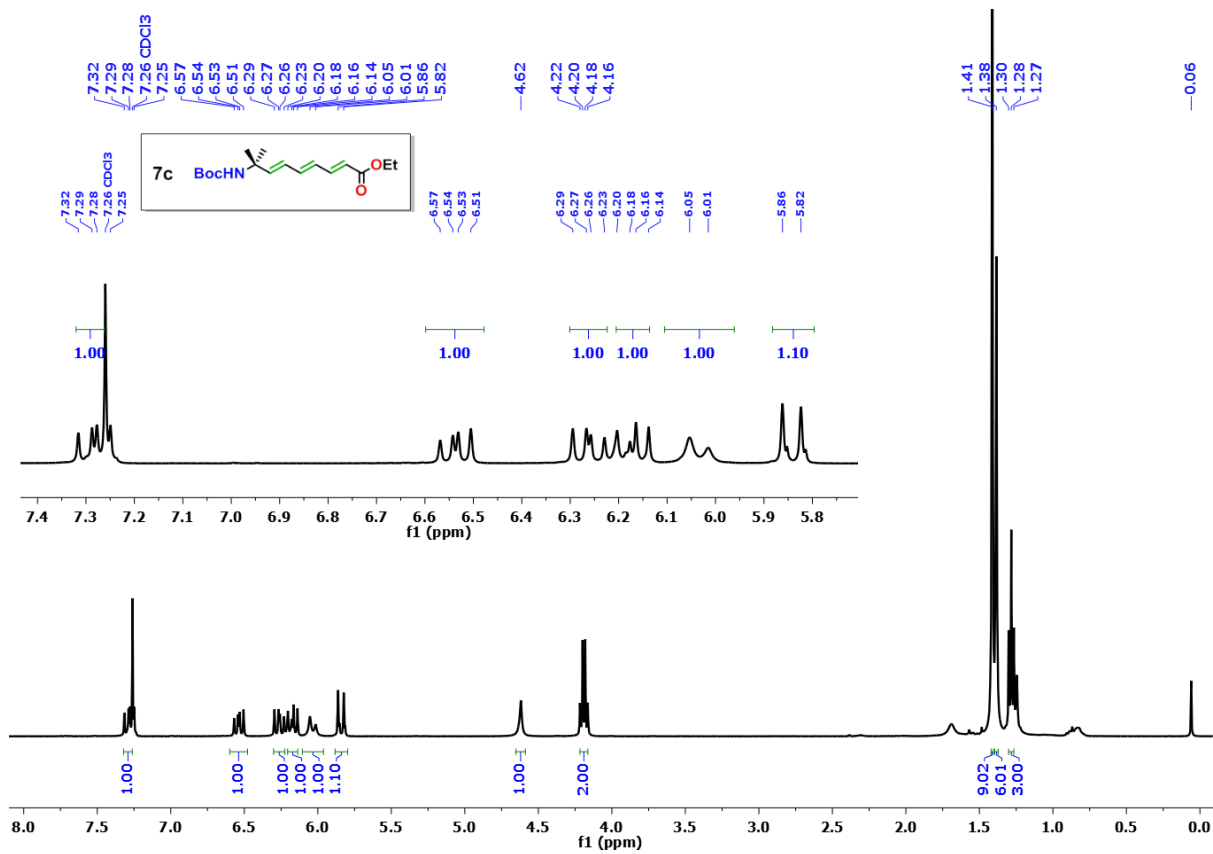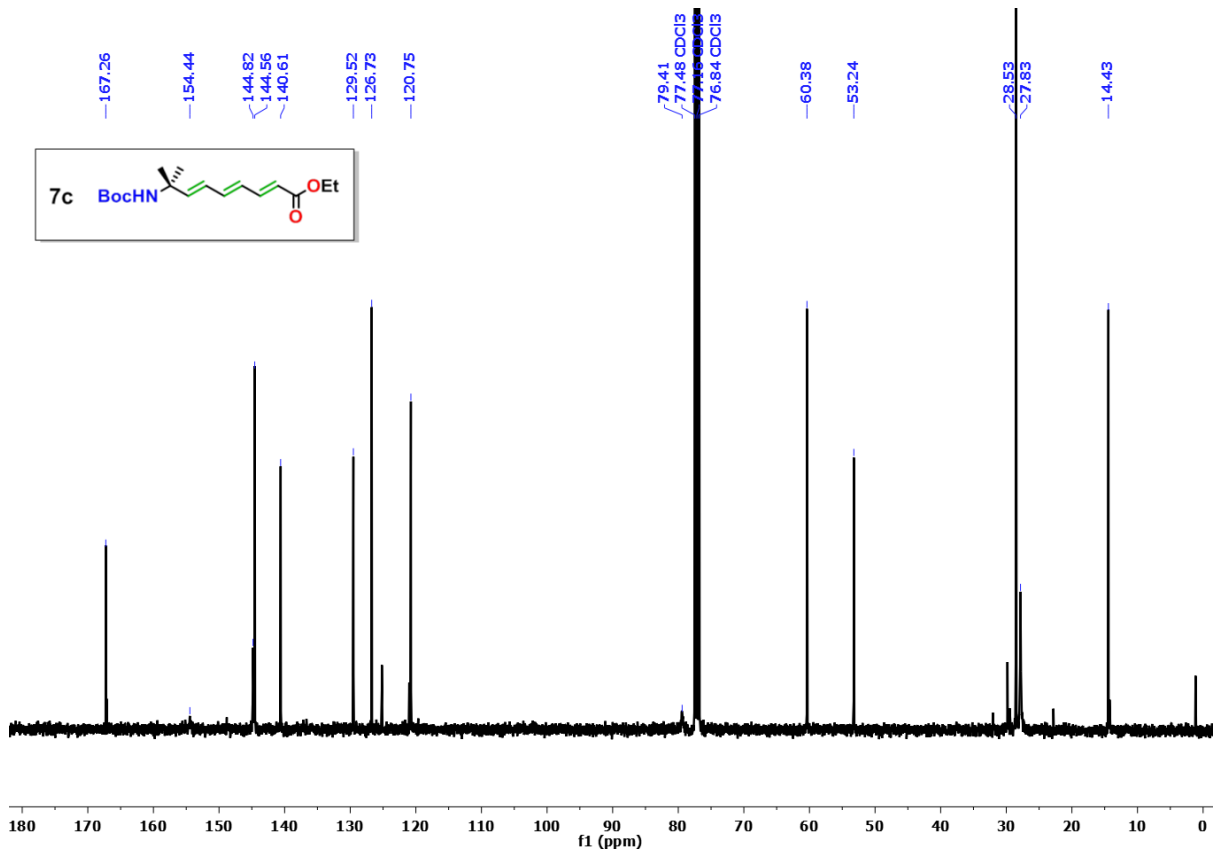



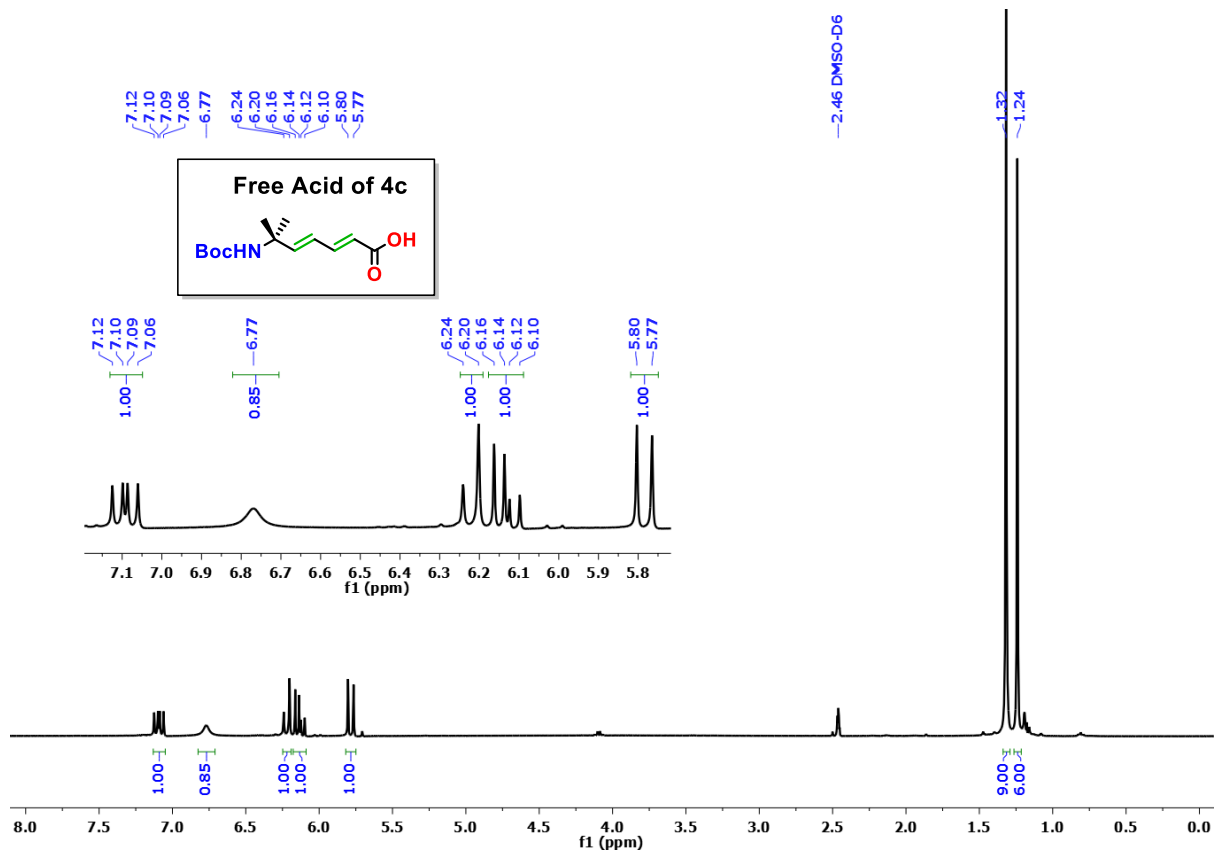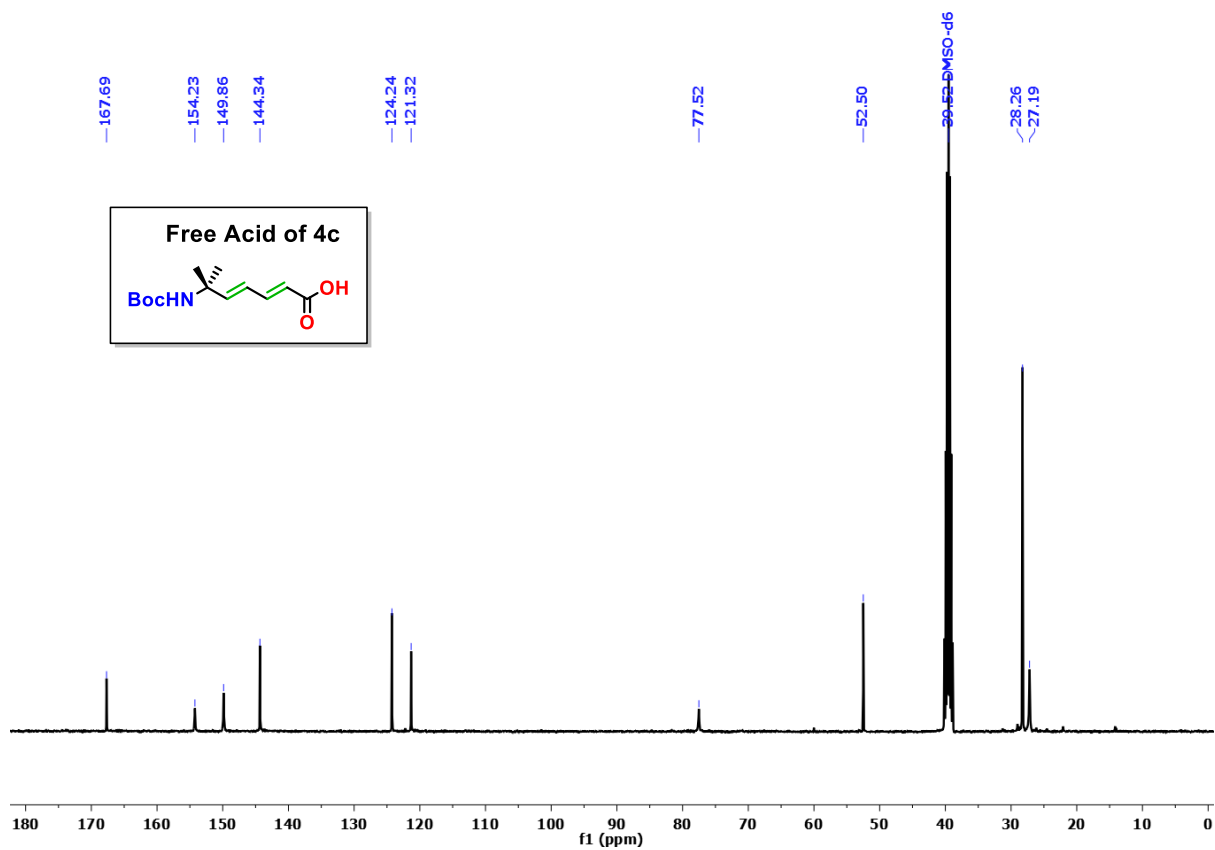

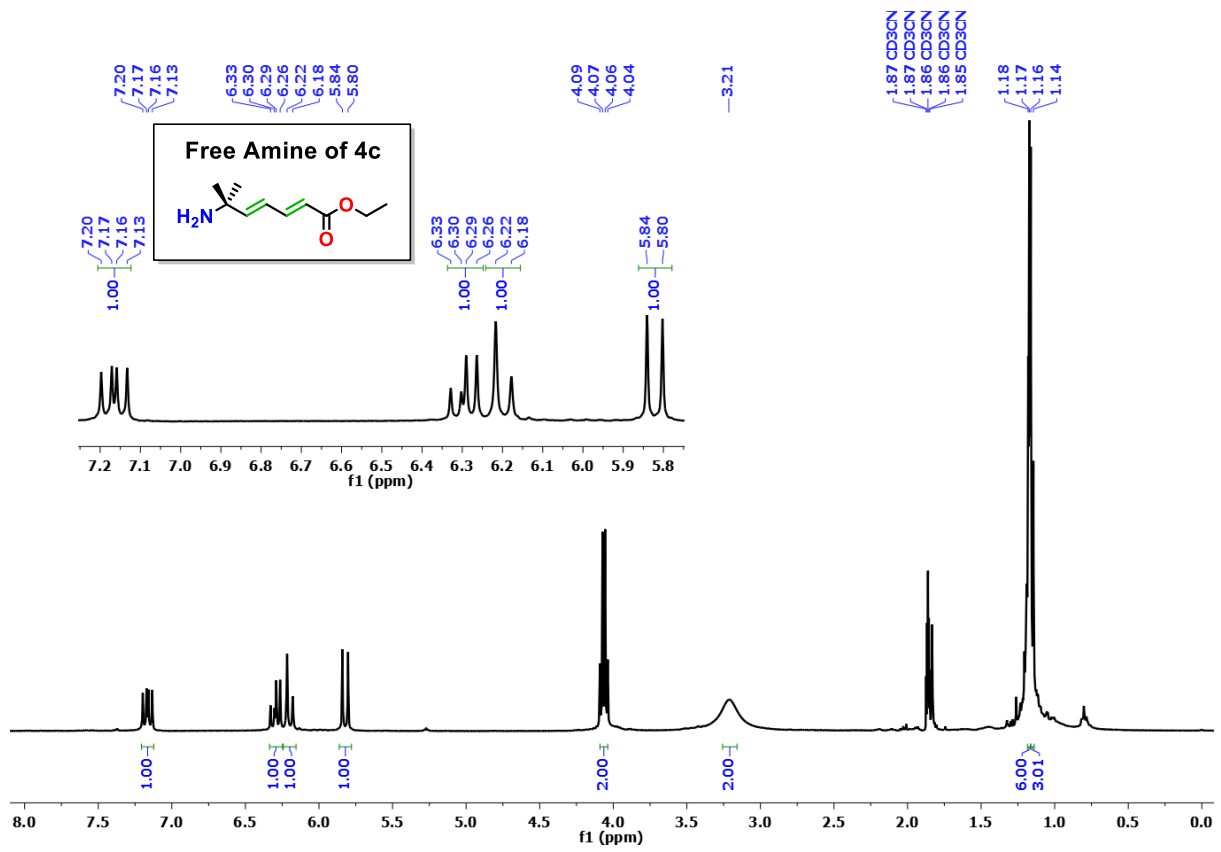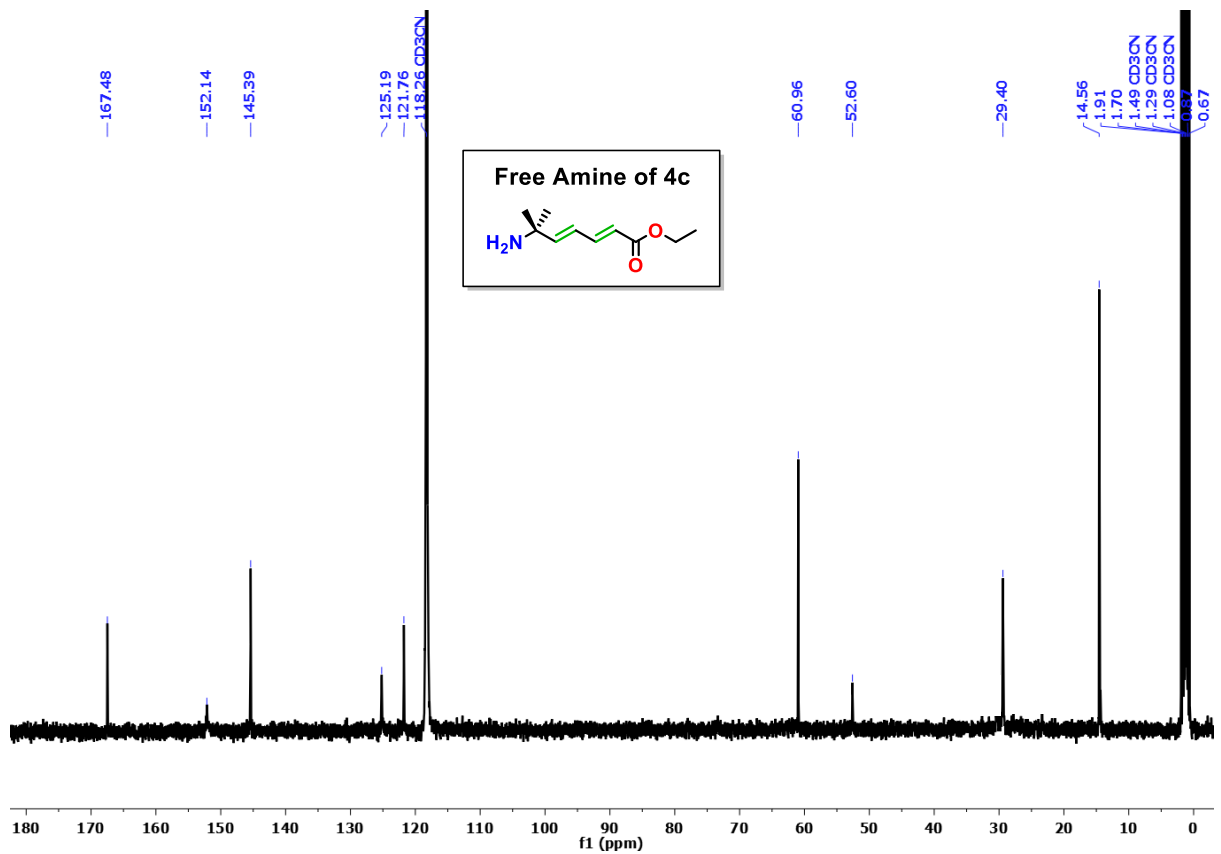

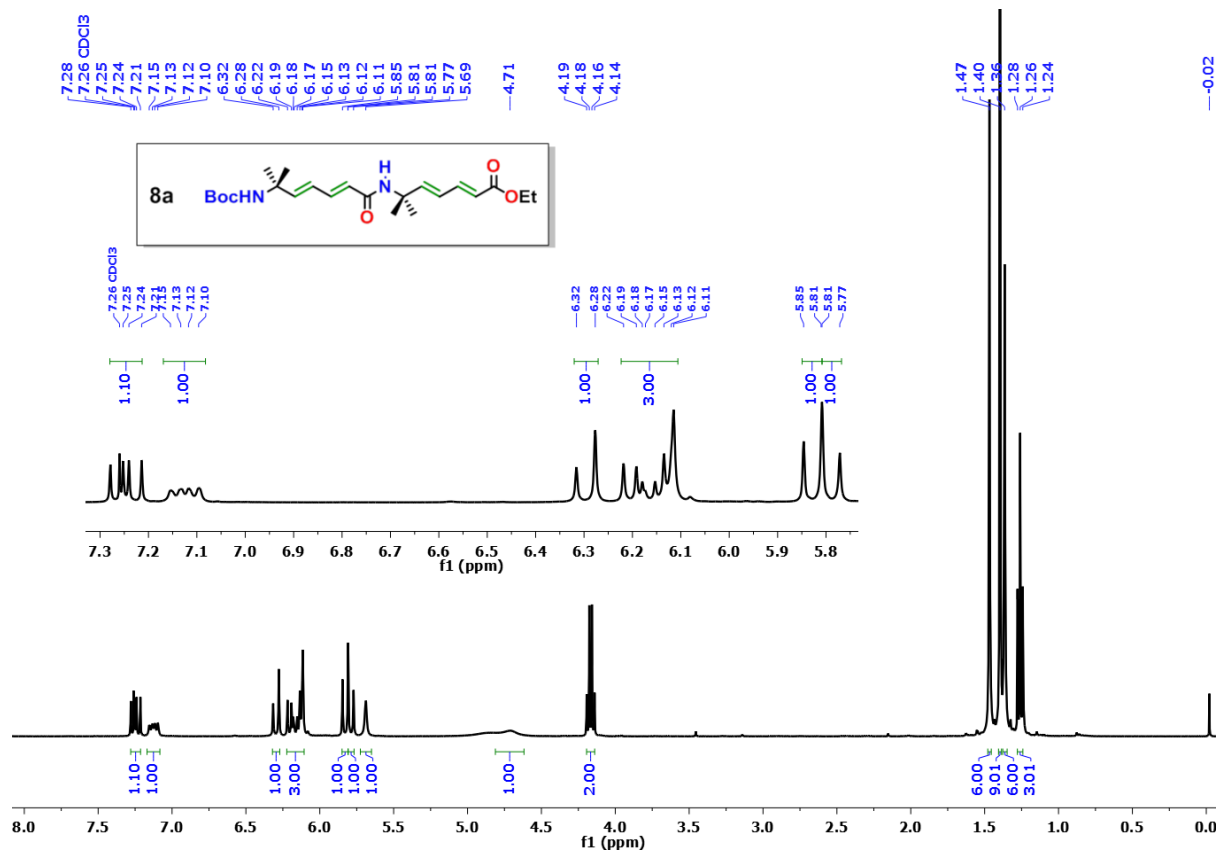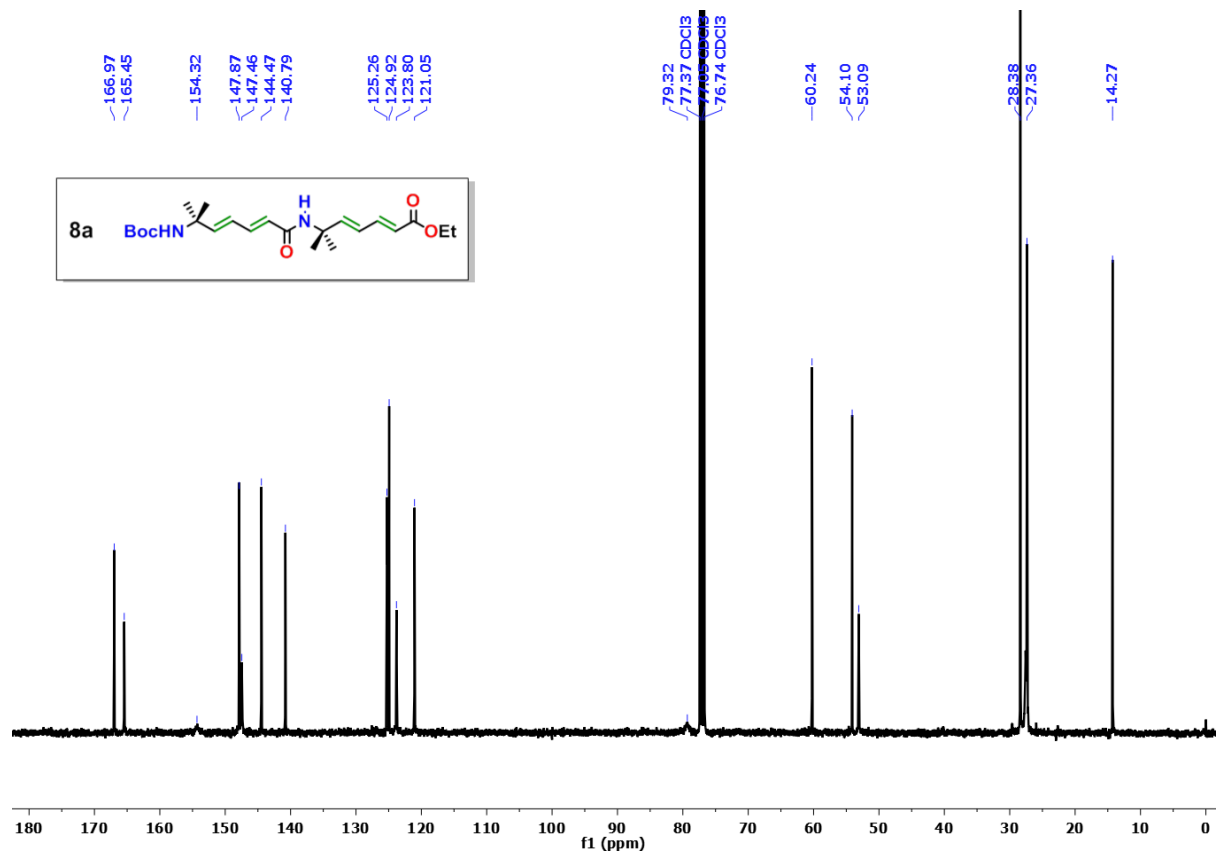

Supplement: d3ob00090g1.pdf [file d3ob00090g1.pdf]
